# Supplementary material
Source: PubMed Central journal article supplement (PMC2946090)
Supplement: NIHMS227122-supplement-1.pdf [file NIHMS227122-supplement-1.pdf]

## **Supplementary Discussion**

### **Structural determination of CusA**

Data collection and refinement statistics are summarized in Tables S1 and S2. The resulting experimental electron density maps (Fig. S1) based on MIRAS reveal that the asymmetric unit consists of one protomer. The native crystal structure of CusA has been determined to a resolution of 3.52 Å (Table S1). Currently, 97.9% of the residues (residues 5-504 and 516-1040) are included in our final model. The final structure is refined to  $R_{\text{work}}$  and  $R_{\text{free}}$  of 23.7% and 27.9%, respectively. Superimposition of the structure of CusA with the structure of AcrB (pdb code:1IWG)<sup>5</sup> results in a high RMSD of 11.4 Å for 1,003 C<sup>α</sup> atoms, suggesting highly significant differences between these two transporters.

### **Reconstitution and stop-flow transport assay**

Although all of our experimental results strongly suggest that these five methionine pairs/clusters (Fig. 4) are important for metal transport, we cannot definitively rule out the possibility that these mutations may affect the structure of the pump and in that way impair metal binding. Nonetheless, our collective experiments provide direct evidence that CusA is capable of taking up Ag<sup>+</sup> from the cytoplasm. It should be noted that no decrease in fluorescence signal was detected in the absence of a pH gradient (i.e. no differential pH) between the inside and outside of the proteoliposomes, or if the intravesicular pH is higher than the extravesicular pH (i.e. reverse pH gradient) (Fig. S13).

## **Superimposition of the structures of CusA and AcrB**

We superimposed a protomer of apo-CusA onto each protomer of the “asymmetric” AcrB (pdb code: 2DHH).<sup>7</sup> Likewise, we also superimposed a protomer of CusA-Cu(I) onto those of the AcrB pump. These superimpositions gave high overall RMSDs, each RMSD exceeding 11 Å. However, when the portion of the apo-CusA protomer that contains only sub-domains PC1, PC2, PN1 and PN2 was superimposed onto those of the “extrusion”, “binding” and “access” conformers of AcrB (2DHH),<sup>7</sup> we obtained much smaller RMSDs of 4.7 Å, 5.6 Å and 5.5 Å. Similarly, superimpositions of the periplasmic domain (only containing PC1, PC2, PN1 and PN2) of a protomer of CusA-Cu(I) onto those of the “extrusion”, “binding” and “access” conformers of AcrB (2DHH)<sup>7</sup> gave RMSDs of 6.2 Å, 5.0 Å and 5.3 Å, respectively. These superimpositions suggest that the conformation of the apo-CusA protomer may correspond to the “extrusion” state, and that the CusA-Cu(I) protomer structure may represent the “binding” conformation of the pump. If this is the case, CusA may go through a cyclic conformational change, from the “access”, through to the “binding” and finally to the “extrusion” conformer, as suggested for the AcrB pump,<sup>7-9</sup> to export copper/silver.

We also superimposed the Cu(I)-binding site of CusA onto the doxorubicin binding site of AcrB<sup>7</sup>. The superimposition suggests that the locations of the bound copper and drug molecule are within 3 Å apart (Fig. S14).

## Supplemental Figures

Fig. S1. Stereo view of the experimental electron density map at a resolution of 3.8 Å.

(a) The electron density map contoured at 1.2  $\sigma$  is in blue. Each subunit of CusA consists of 34 methionines. 33 selenium sites are found with a single SeMet crystal. The anomalous maps of the selenium sites contoured at 4  $\sigma$  are in green. The C $\alpha$  traces of CusA are in red. (b) Anomalous maps of the 33 selenium sites (contoured at 4  $\sigma$ ). The selenium sites corresponding to the 11 methionines forming the methionine-residue relay network are in green. The rest of the 22 selenium sites are in purple. The C $\alpha$  traces of CusA are in red. (c) Representative section of the electron density in the second domain of CusA. The electron density (colored blue) is contoured at the 1.2  $\sigma$  level and superimposed with the final refined model (yellow, carbon; red, oxygen; blue, nitrogen).

Fig. S2. Sequence and topology of CusA and AcrB. Alignment of the amino acid sequences of CusA and AcrB were done using CLUSTAL W. \*, identical residues; :, >60% homologous residues. Secondary structural elements are indicated: TM, transmembrane helix; N $\alpha$  and N $\beta$ , helix and strand, respectively, in the N-terminal half; C $\alpha$  and C $\beta$ , helix and strand, respectively, in the C-terminal half. The CusC or TolC docking domain is divided into two sub-domains, DN and DC; whereas the pore domain is divided into four sub-domains, PN1, PN2, PC1 and PC2. The sequence and topology of CusA are shown at the top, and those for the AcrB pump are shown at the bottom.

Fig. S3. Experimental electron density of the periplasmic domain of CusA. (a) The electron density map of apo-CusA (3.8 Å-resolution) contoured at 1.2  $\sigma$  is in blue. The

C $\alpha$  traces of the periplasmic domain of apo-CusA are in red. (b) The electron density map of CusA-Cu(I) (4.1 Å-resolution) contoured at 1.2  $\sigma$  is in purple. The C $\alpha$  traces of the periplasmic domain of CusA-Cu(I) are in green. The bound copper is shown as a brown sphere.

Fig. S4. Ion pairs in the transmembrane domain viewed from the cytoplasmic side. Residues D405 of TM4, E939 of TM10 and K984 of TM11 that form ion pairs, which may play an important role in proton translocation, are in yellow sticks. The six methionines, M391, M403, M410, M486, M501 and M1009, are shown as pink sticks.

Fig. S5. Docking of CusB to CusA. (a) Side view of the docked complex of CusBA. The three CusB protomers are shown in green ribbons. The trimeric CusA is in gray surfaces. Sub-domains PN2 and PC1 of CusA are in red and blue, respectively. Specific interaction is found to occur between Domain 2 of CusB and the groove formed between DN and DC sub-domains of CusA to further stabilize the complex. (b) Top view of the docked complex of CusBA.

Fig. S6. Stereo view of the methionine-residue relay network. (a) The transmembrane domain of a subunit of CusA viewed from the cytoplasmic side. The six methionines that form three pairs in the transmembrane region are in green sticks. (b) The periplasmic domain of a subunit of CusA viewed from the periplasmic side. The five methionines that form a triad and a pair in the periplasmic domain are in green sticks.

Fig. S7. Alignment of amino acid sequences of the HME-RND-type Cu(I) and/or Ag(I) efflux pumps using CLUSTAL W. \*, identical residues; :, >60% homologous residues. The alignment suggests that the methionine residues forming the relay network are conserved among these 30 different pumps. Six of these methionines located at the transmembrane region are highlighted with gray bars.

Fig. S8. Channel in the CusA pump. (a) Stereo view of the channel formed by the front protomer of apo-CusA (red) leading through the transmembrane and periplasmic domains is in gray color. This channel was calculated using the position of the sulfur atom of residue M672 as a starting point. The diameter of this channel ranges between 4.4 and 8.9 Å. The 11 methionines forming the relay network are in spheres (green, carbon; red, oxygen; blue, nitrogen; orange, sulfur). The distances between consecutive methionine pairs, from the cytoplasm to the periplasm, are 10.1, 12.1, 17.5 and 14.0 Å, respectively. Two other CusA protomers behind the front protomer are shown as blue wires. (b) Stereo view of the channel formed by the front protomer of Cu(I) bound-CusA (green) leading through the transmembrane and periplasmic domains is in gray color. This channel was calculated using the position of the sulfur atom of residue M672 as a starting point. The diameter of this channel ranges between 5.6 and 9.1 Å. The 11 methionines forming the relay network are in spheres (pink, carbon; red, oxygen; blue, nitrogen; orange, sulfur). The distances between consecutive methionine pairs, from the cytoplasm to the periplasm, are 9.4, 13.0, 20.0 and 14.7 Å, respectively. The bound Cu(I) is completely buried inside the channel. Two other CusA protomers behind the front protomer are shown as blue wires. The funnel formed by sub-domains DN and DC is

indicated with a dotted curve. For clarity, the channels formed by the other two protomers at the back are omitted. The calculations were done using the program CAVER (<http://loschmidt.chemi.muni.cz/caver>).

Fig. S9. A cartoon of a proteoliposome containing the CusA trimers. The CusA trimers are in green. The intravesicular space is loaded with the fluorescence indicator PGSK (blue star).  $\text{Ag}^+$  (red sphere) is then added into the extravesicular medium for metal transport.

Fig. S10. The neighbor dependent opening closing motions. We show the effects of the strong internal motions on the CusA trimer. In the center is a diagram of the periplasmic domain looking downward, towards the inner membrane. We build an elastic network model using the formalism of Atilgan et al.<sup>34</sup> to predict the natural motions of CusA. On each of three sides we show the effect of two of the structure's natural motions. These motions describe coupled opening and closing of adjacent periplasmic metal entry sites. Black wedges are shown in open and closed form, indicating the approximate angle between the edges of PC1 and PC2 in each motion. From these the alternating open/close motion is evident.

Fig. S11. The swinging motion of PC2 coupled to TM8, as computed with the same elastic network model used for Fig. S10. This motion is similar to the difference between the apo and bound crystal forms displayed in Fig. 2. An arrow indicates the motion of

swinging from the red conformation to the green. For clarity PC2 and TM8 are shown in thicker lines than the remainder of the monomer.

Fig. 12. Expression level of the CusA pumps. An immunoblot against CusA of crude extracts from 50 µg dry cells of strain BL21(DE3) $\Delta$ *cueO* $\Delta$ *cusA* expressing the CusA pumps (M755I, lane 1; M391I, lane 2; M410I, lane 3; M486I, lane 4; wild-type, lane 5; marker, lane 6; M573I, lane 7; M623I, lane 8; M672I, lane 9) is shown.

Fig. S13. Stopped-flow transport assay of reconstituted wild-type CusA with extravesicular Ag<sup>+</sup> ion at different intravesicular and extravesicular pHs. The stopped-flow traces are the cumulative average of four successive recordings (intravesicular pH = 6.6 and extravesicular pH = 7.0, black curve; intravesicular pH = extravesicular pH = 6.6, blue curve; intravesicular pH = extravesicular pH = 7.0, green curve; intravesicular pH = 7.0 and extravesicular pH = 6.6, pink curve; control liposome, red curve).

Fig. S14. Comparison of the CusA and AcrB binding sites. Superimposition of a subunit of Cu(I) bound-CusA (green) onto the “binding” protomer of AcrB (orange) with doxorubicin (pdb code: 2DH6).<sup>7</sup> In this superimposition, the bound copper and doxorubicin are 3 Å apart. The bound Cu(I) and doxorubicin are colored red and blue, respectively.

**Table S1.** Data collection and refinement statistics of apo-CusA.

|                                                      | Native CusA | Au(III)     | Ta <sub>6</sub> Br <sub>12</sub> <sup>2+</sup> | Se (peak)   |
|------------------------------------------------------|-------------|-------------|------------------------------------------------|-------------|
| <b>Data collection</b>                               |             |             |                                                |             |
| Space group                                          | <i>R</i> 32 | <i>R</i> 32 | <i>R</i> 32                                    | <i>R</i> 32 |
| Cell dimensions                                      |             |             |                                                |             |
| <i>a</i> , <i>b</i> , <i>c</i> (Å)                   | 178.42,     | 179.31,     | 178.34,                                        | 178.21,     |
|                                                      | 178.42,     | 179.31,     | 178.34,                                        | 178.21,     |
|                                                      | 285.75      | 287.10      | 284.23                                         | 285.57      |
| $\alpha$ , $\beta$ , $\gamma$ (°)                    | 90, 90, 120 | 90, 90, 120 | 90, 90, 120                                    | 90, 90, 120 |
| Wavelength (Å)                                       | 0.9791      | 1.0398      | 1.0089                                         | 0.9791      |
| Resolution (Å)                                       | 50-3.52     | 50-4.31     | 50-3.52                                        | 50-3.68     |
|                                                      | (3.62-3.52) | (4.50-4.31) | (3.66-5.52)                                    | (3.81-3.68) |
| <i>R</i> <sub>sym</sub> or <i>R</i> <sub>merge</sub> | 5.7 (43.5)  | 10.2 (35.9) | 6.2 (37.7)                                     | 7.5 (46.9)  |
| <i>I</i> / $\sigma$ <i>I</i>                         | 32.5 (4.0)  | 17.3 (5.2)  | 21.7 (3.4)                                     | 19.7 (2.6)  |
| Completeness (%)                                     | 94.2 (95.8) | 100 (100)   | 99.9 (100)                                     | 100 (100)   |
| Redundancy                                           | 6.9 (6.9)   | 3.2 (2.8)   | 3.8 (3.9)                                      | 3.9 (3.9)   |
| <b>Refinement</b>                                    |             |             |                                                |             |
| Resolution (Å)                                       | 50-3.52     |             |                                                |             |
| No. reflections                                      | 432,346     |             |                                                |             |
| <i>R</i> <sub>work</sub> / <i>R</i> <sub>free</sub>  | 0.238/0.275 |             |                                                |             |
| No. atoms                                            |             |             |                                                |             |
| Protein                                              | 7,884       |             |                                                |             |
| Ligand/ion                                           | 0           |             |                                                |             |
| Water                                                | 0           |             |                                                |             |
| R.m.s deviations                                     |             |             |                                                |             |
| Bond lengths (Å)                                     | 0.004       |             |                                                |             |
| Bond angles (°)                                      | 0.874       |             |                                                |             |

\*Highest resolution shell is shown in parenthesis.



**Table S2.** Data collection and refinement statistics of the CusA-Cu(I) and CusA-Ag(I) complexes.

|                                                      | Cu(I) (peak)                 | Cu(I)                        | Ag(I)                        |
|------------------------------------------------------|------------------------------|------------------------------|------------------------------|
| <b>Data collection</b>                               |                              |                              |                              |
| Space group                                          | <i>R</i> 32                  | <i>R</i> 32                  | <i>R</i> 32                  |
| Cell dimensions                                      |                              |                              |                              |
| <i>a</i> , <i>b</i> , <i>c</i> (Å)                   | 178.21,<br>178.21,<br>285.57 | 179.14,<br>179.14,<br>286.12 | 179.99,<br>179.99,<br>287.98 |
| $\alpha$ , $\beta$ , $\gamma$ (°)                    | 90, 90, 120                  | 90, 90, 120                  | 90, 90, 120                  |
| Wavelength (Å)                                       | 1.3779                       | 1.0333                       | 1.3779                       |
| Resolution (Å)                                       | 50-4.10<br>(4.25-4.10)       | 50-3.88<br>(4.03-3.88)       | 50-4.35<br>(4.51-4.35)       |
| <i>R</i> <sub>sym</sub> or <i>R</i> <sub>merge</sub> | 8.9 (42.4)                   | 9.0 (42.6)                   | 9.2 (39.6)                   |
| <i>I</i> / $\sigma$ <i>I</i>                         | 11.8 (1.8)                   | 10.5 (2.1)                   | 14.9 (2.0)                   |
| Completeness (%)                                     | 96.6 (98.7)                  | 99.5 (98.8)                  | 99.7 (99.9)                  |
| Redundancy                                           | 2.5 (2.5)                    | 3.2 (3.1)                    | 3.3 (3.4)                    |
| <b>Refinement</b>                                    |                              |                              |                              |
| Resolution (Å)                                       |                              | 50-3.88                      | 50-4.35                      |
| No. reflections                                      |                              | 346,057                      | 258,908                      |
| <i>R</i> <sub>work</sub> / <i>R</i> <sub>free</sub>  |                              | 0.261/0.296                  | 0.271/0.312                  |
| No. atoms                                            |                              |                              |                              |
| Protein                                              |                              | 7,802                        | 7,782                        |
| Ligand/ion                                           |                              | 1                            | 1                            |
| Water                                                |                              | 0                            | 0                            |
| R.m.s deviations                                     |                              |                              |                              |
| Bond lengths (Å)                                     |                              | 0.005                        | 0.006                        |
| Bond angles (°)                                      |                              | 0.995                        | 1.252                        |

\*Highest resolution shell is shown in parenthesis.

Table S3. MICs of copper for different CusA mutants expressed in *E. coli* BL21(DE3) $\Delta$ *cueO* $\Delta$ *cusA*

| Gene in<br>BL21(DE3) $\Delta$ <i>cueO</i> $\Delta$ <i>cusA</i> | MIC (mM) of<br>CuSO <sub>4</sub> |
|----------------------------------------------------------------|----------------------------------|
| Empty vector                                                   | 0.50                             |
| <i>cusA</i> (wild-type)                                        | 2.25                             |
| <i>cusA</i> (M573I)                                            | 0.50                             |
| <i>cusA</i> (M623I)                                            | 0.50                             |
| <i>cusA</i> (M672I)                                            | 0.50                             |
| <i>cusA</i> (M391I)                                            | 1.25                             |
| <i>cusA</i> (M410I)                                            | 1.75                             |
| <i>cusA</i> (M486I)                                            | 1.75                             |
| <i>cusA</i> (M755I)                                            | 1.75                             |
| <i>cusA</i> (D405A)                                            | 0.50                             |
| <i>cusA</i> (E939A)                                            | 0.50                             |
| <i>cusA</i> (K984A)                                            | 0.50                             |
| <i>cusA</i> (E412A)                                            | 1.00 <sup>a</sup>                |
| <i>cusA</i> (S453A)                                            | 1.00 <sup>a</sup>                |
| <i>cusA</i> (C353A)                                            | 2.25 <sup>b</sup>                |
| <i>cusA</i> (C375A)                                            | 2.25 <sup>b</sup>                |

<sup>a</sup>Residues E412 and S453, located in the vicinity of the triad formed by D405, E939 and K984, may also involve in the proton-relay network.

<sup>b</sup>The CusA pump contains only two cysteine residues, C353 and C375, which may not involve in copper resistance.

Table S4. MICs of silver for different CusA mutants expressed in *E. coli* BL21(DE3) $\Delta$ *cueO* $\Delta$ *cusA*

| Gene in<br>BL21(DE3) $\Delta$ <i>cueO</i> $\Delta$ <i>cusA</i> | MIC ( $\mu$ M) of<br>AgNO <sub>3</sub> |
|----------------------------------------------------------------|----------------------------------------|
| Empty vector                                                   | 10.0                                   |
| <i>cusA</i> (wild-type)                                        | 30.0                                   |
| <i>cusA</i> (M573I)                                            | 12.5                                   |
| <i>cusA</i> (M623I)                                            | 12.5                                   |
| <i>cusA</i> (M672I)                                            | 12.5                                   |
| <i>cusA</i> (M391I)                                            | 10.0                                   |
| <i>cusA</i> (M410I)                                            | 17.5                                   |
| <i>cusA</i> (M486I)                                            | 17.5                                   |
| <i>cusA</i> (M755I)                                            | 12.5                                   |
| <i>cusA</i> (D405A)                                            | 12.5                                   |
| <i>cusA</i> (E939A)                                            | 12.5                                   |
| <i>cusA</i> (K984A)                                            | 12.5                                   |
| <i>cusA</i> (E412A)                                            | 12.5 <sup>a</sup>                      |
| <i>cusA</i> (S453A)                                            | 15.0 <sup>a</sup>                      |

<sup>a</sup>Residues E412 and S453, located in the vicinity of the triad formed by D405, E939 and K984, may also involve in the proton-relay network.

Fig. S1a

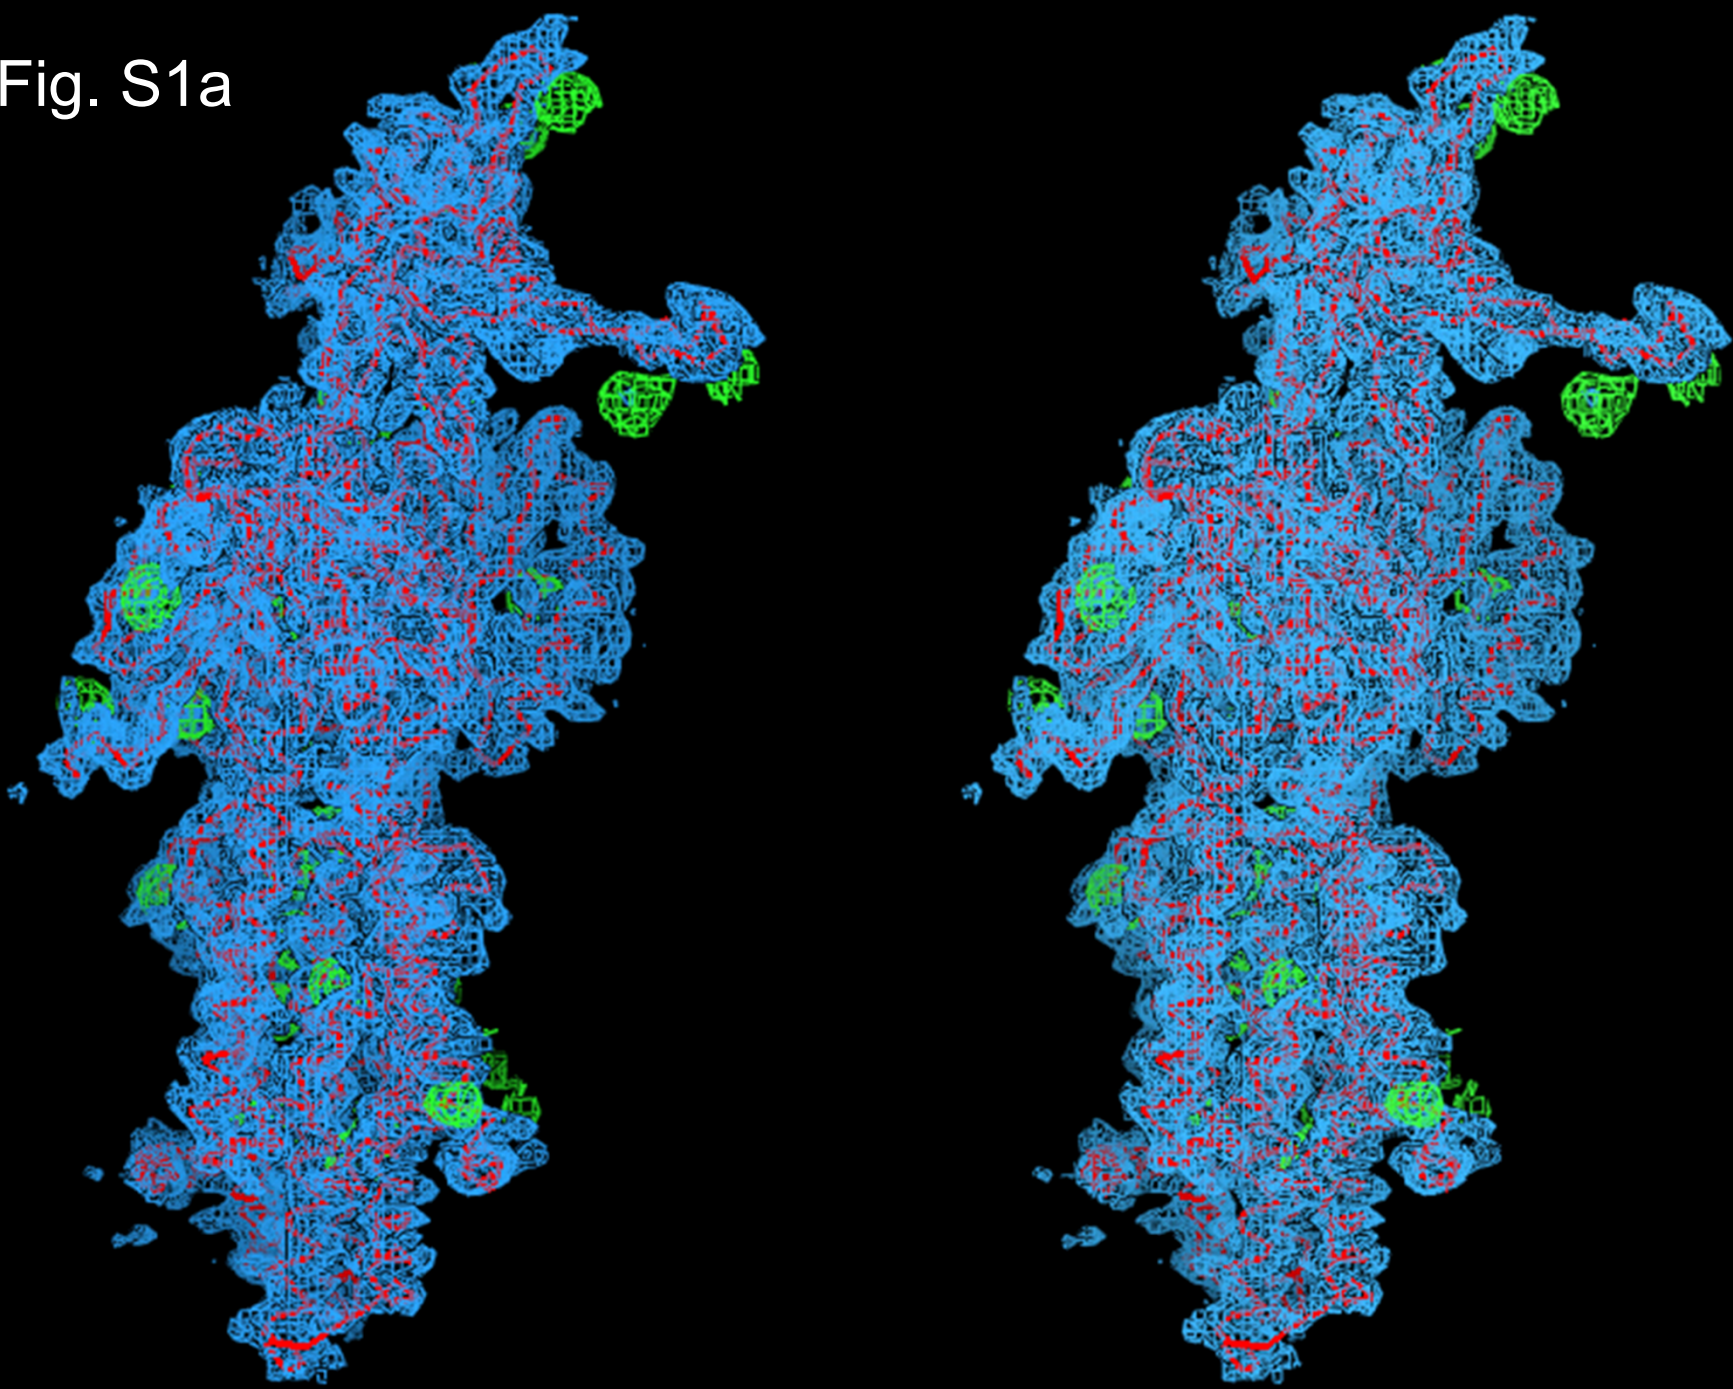

Fig. S1b

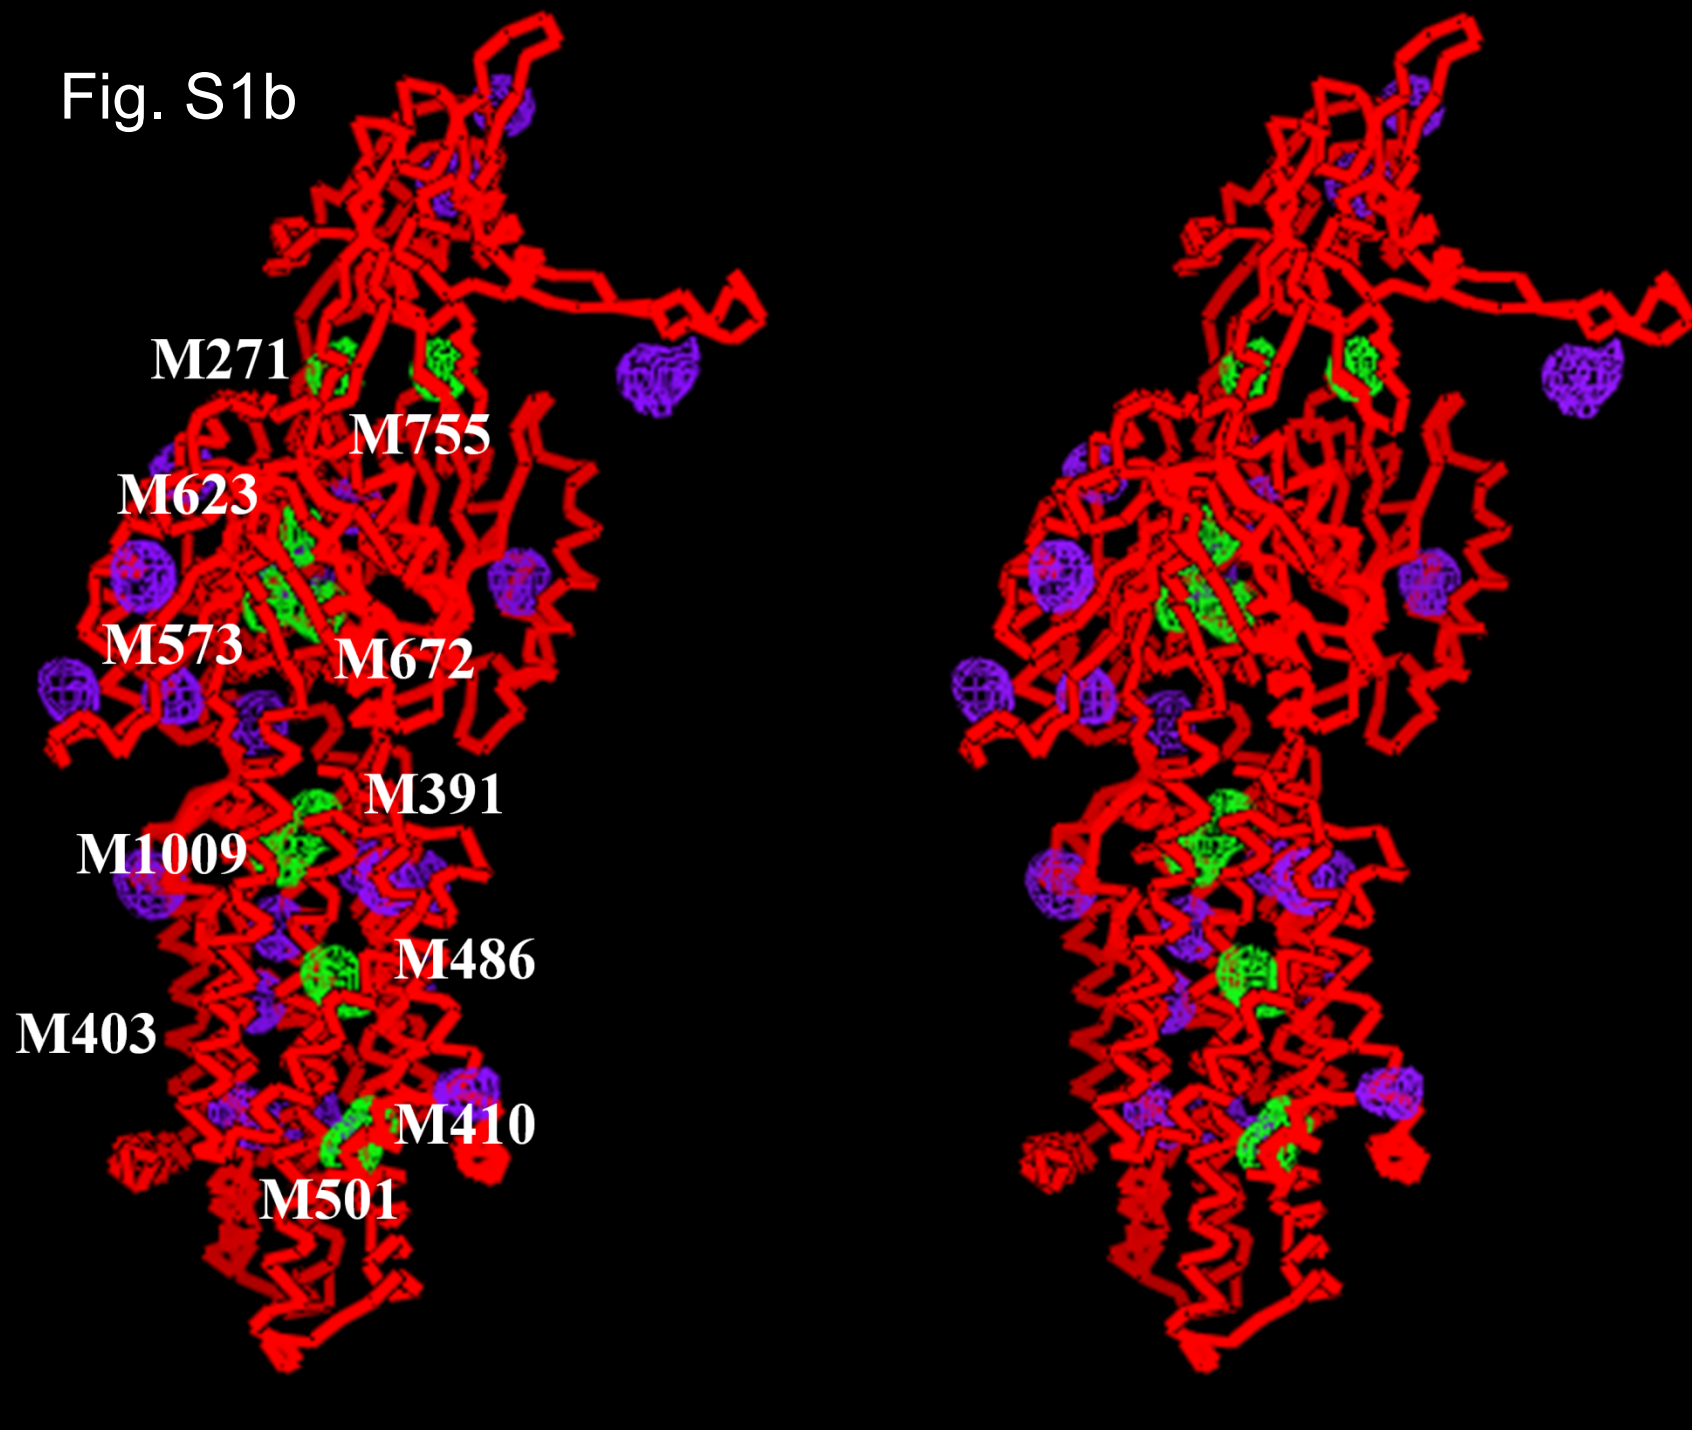

Fig. S1c

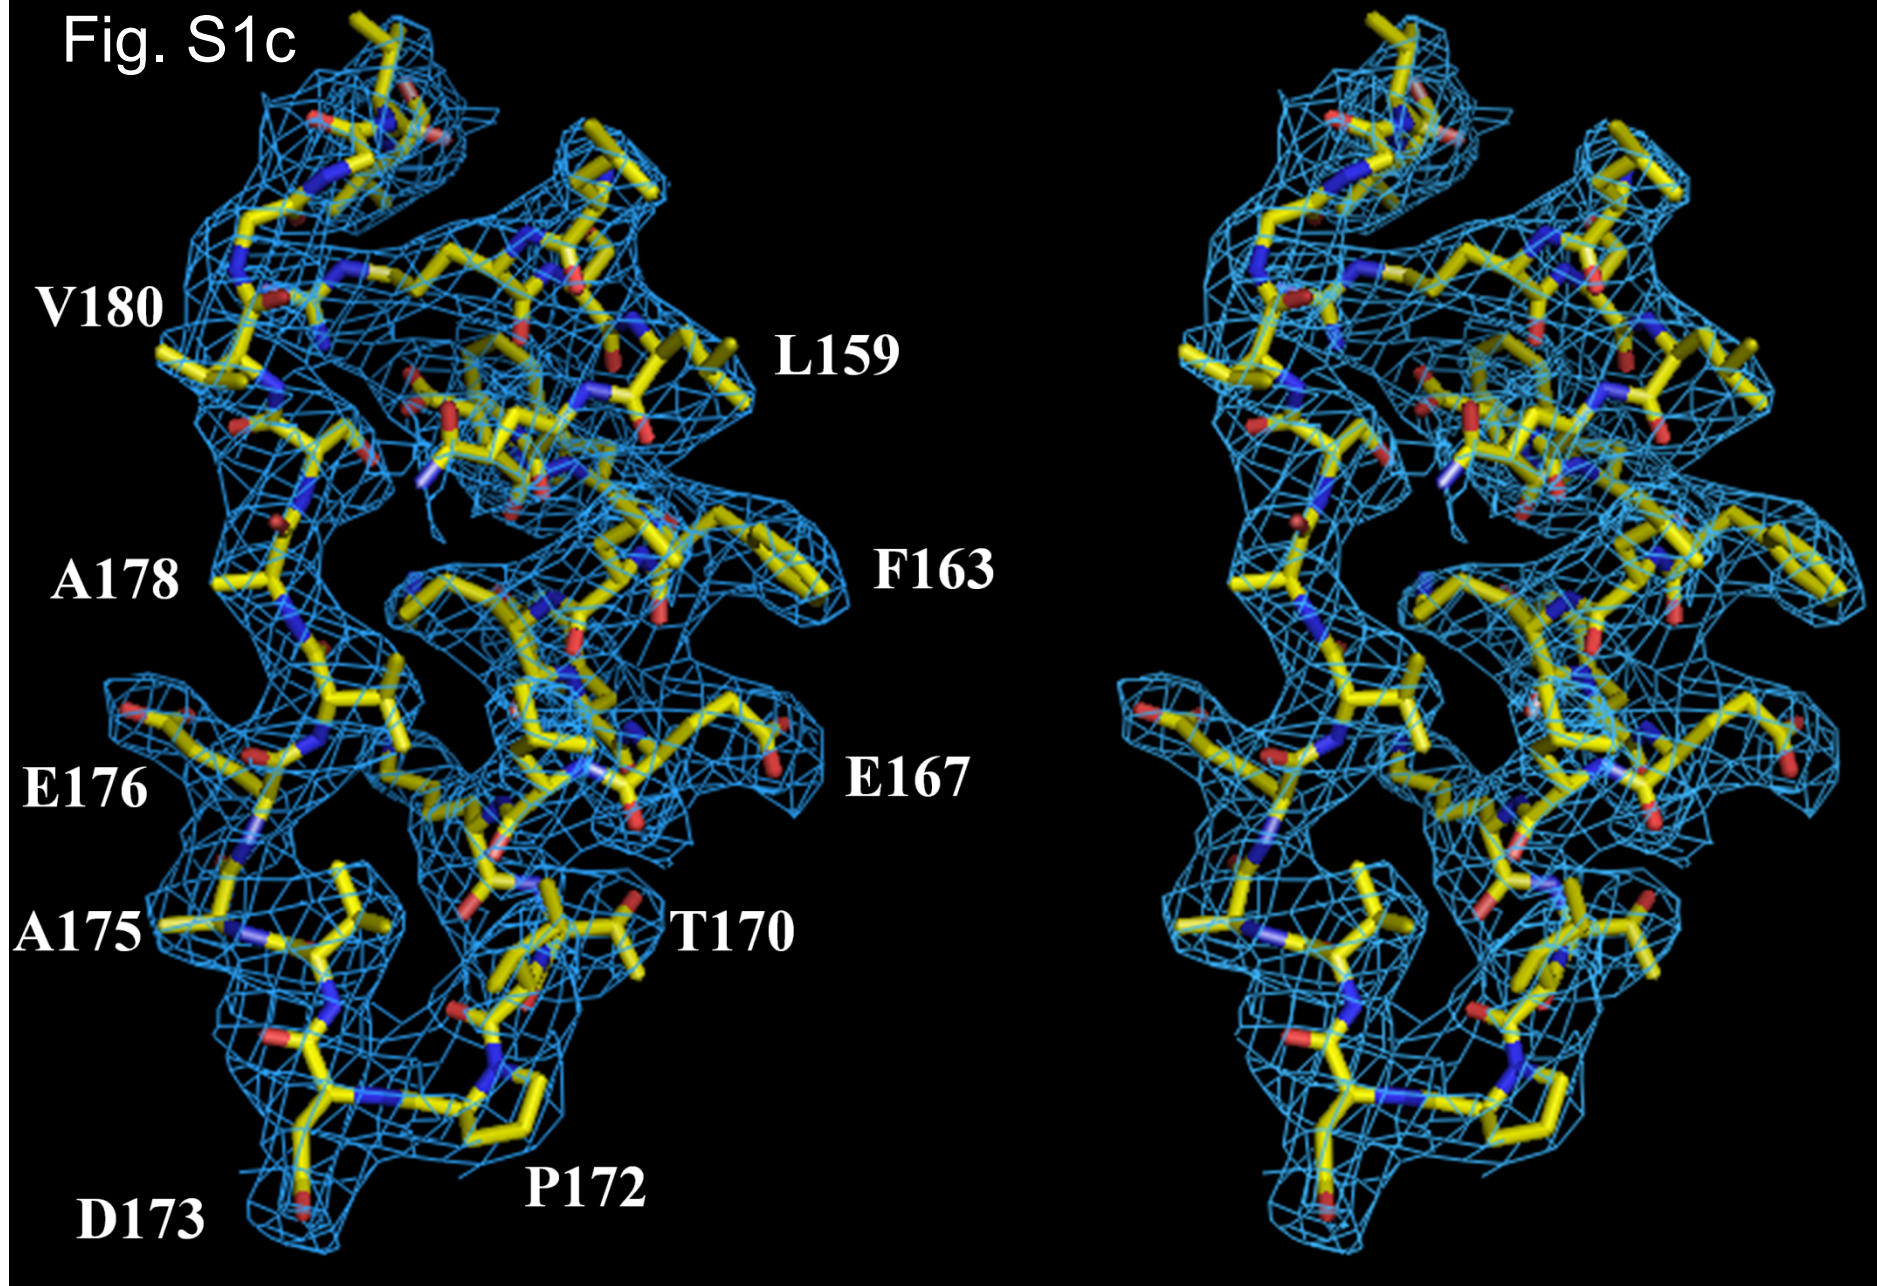

Fig. S2

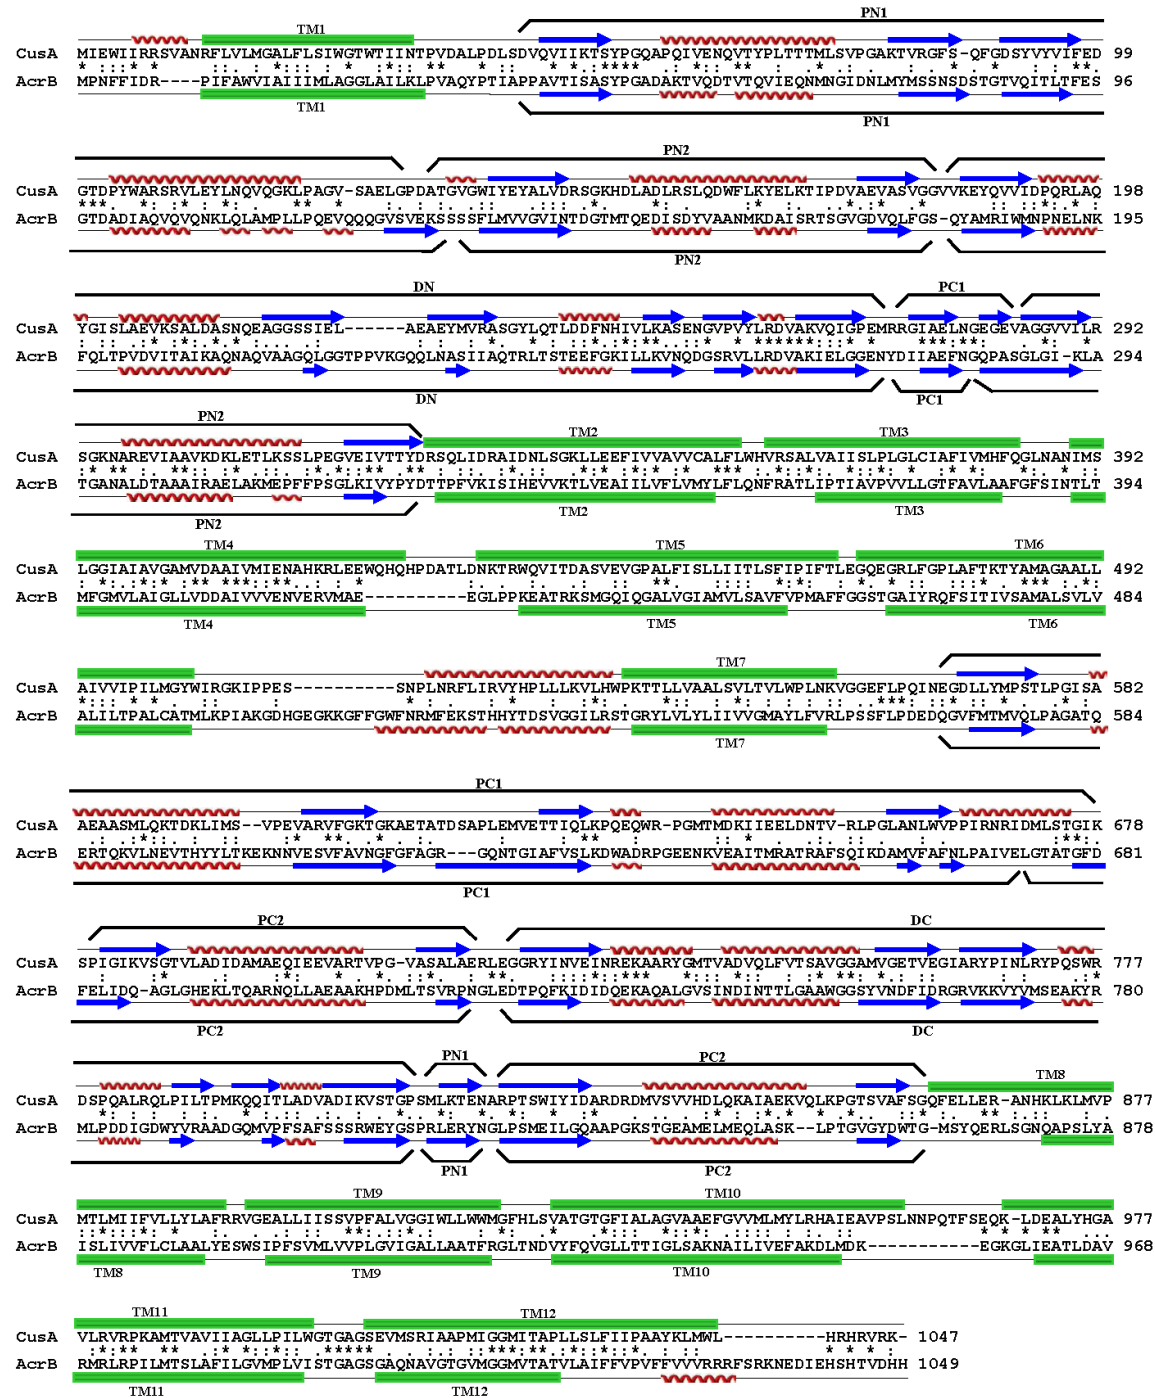

Fig. S3

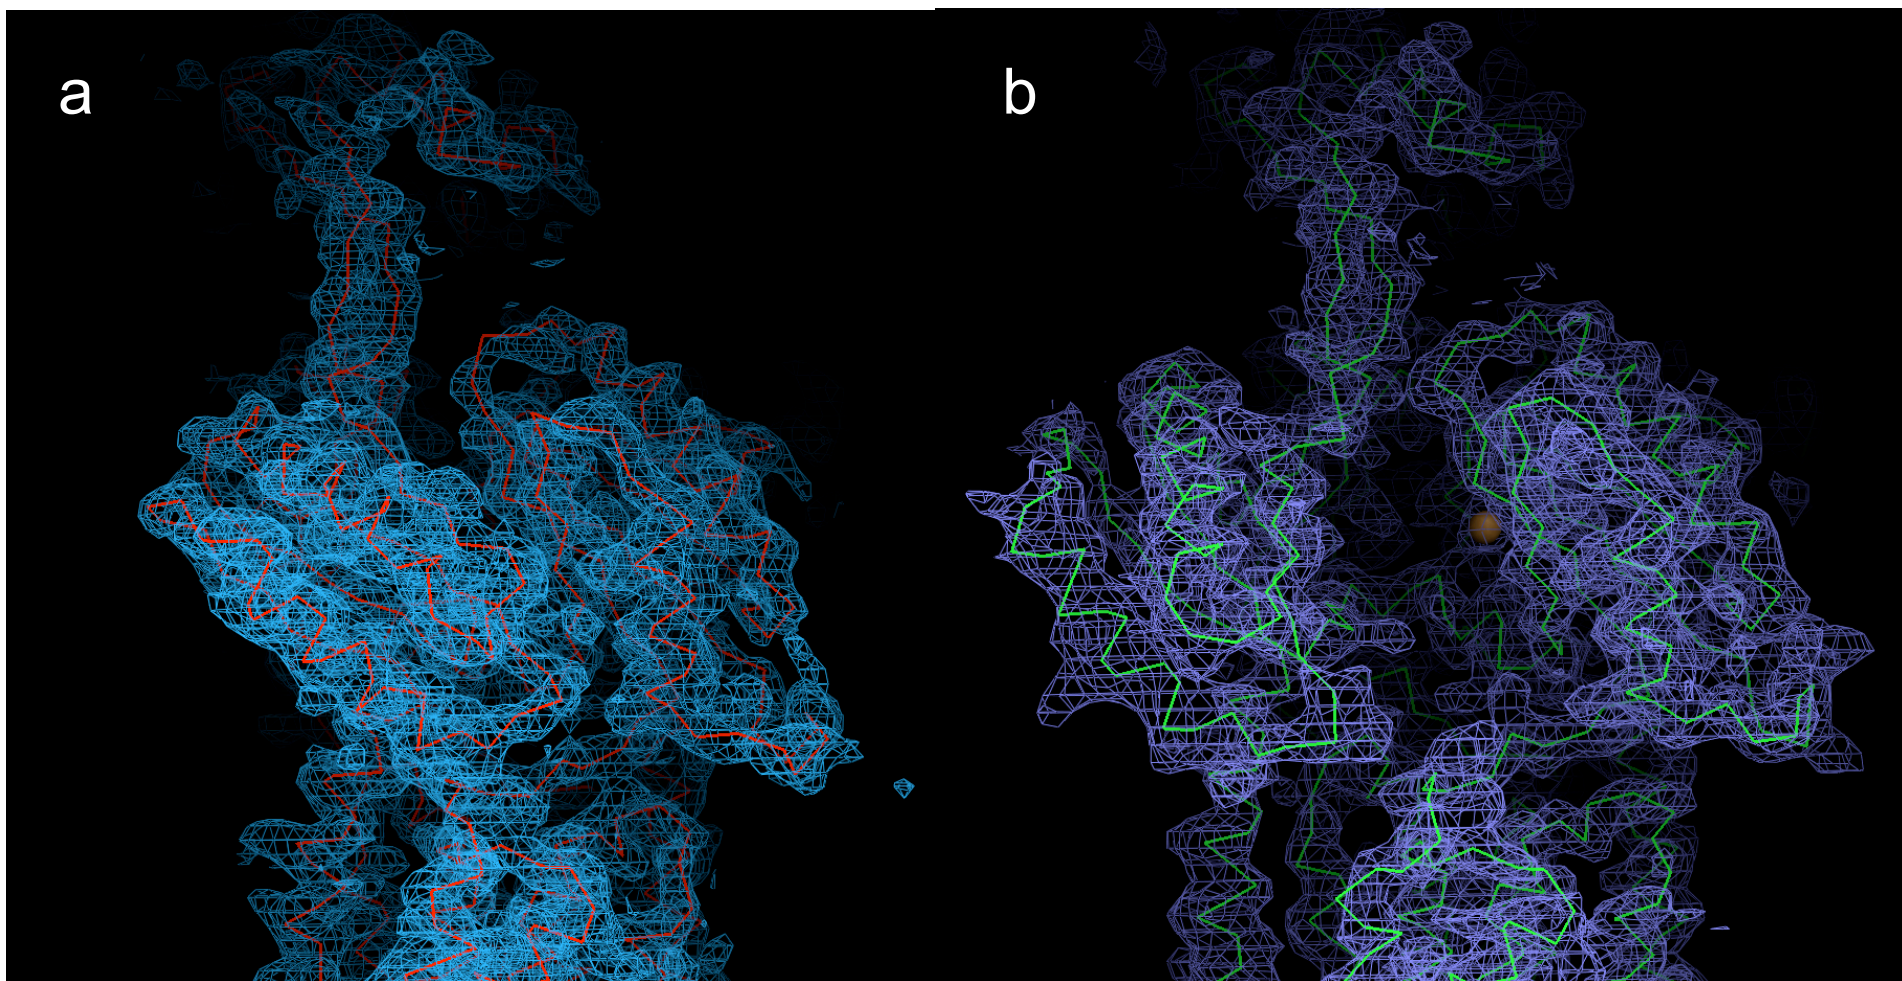



Fig. S4

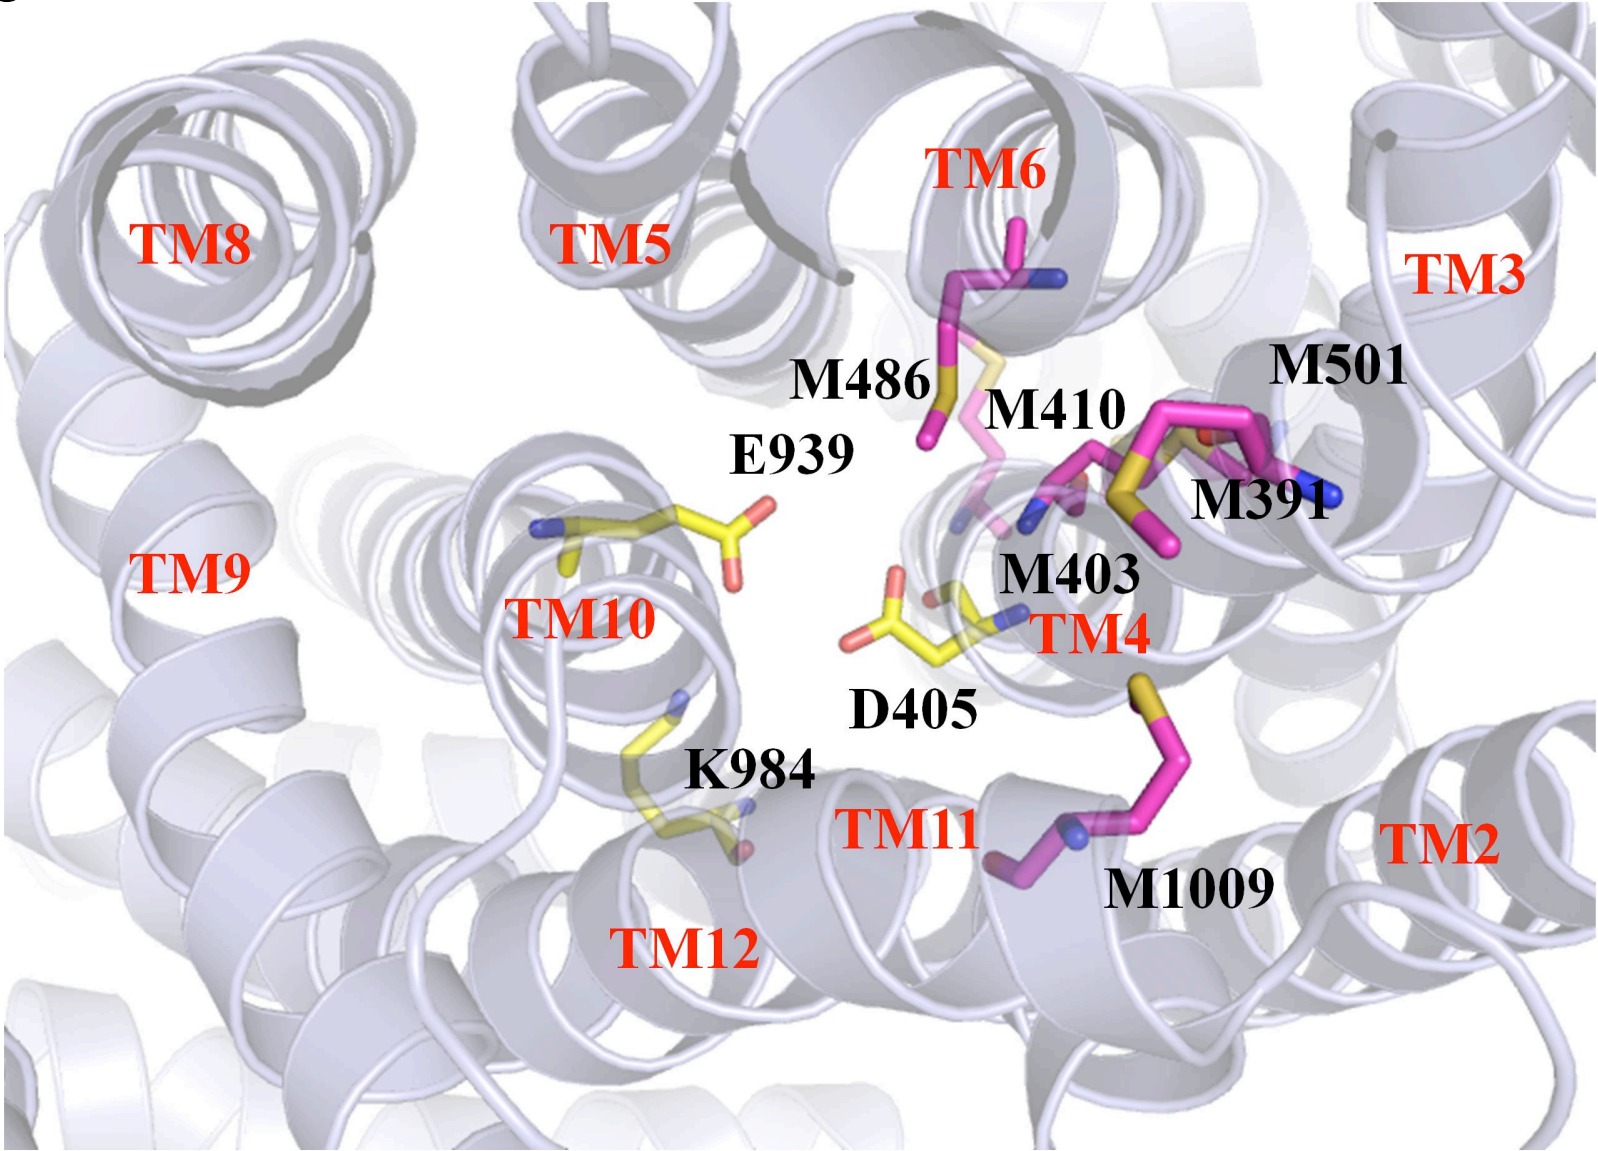

Fig. S5

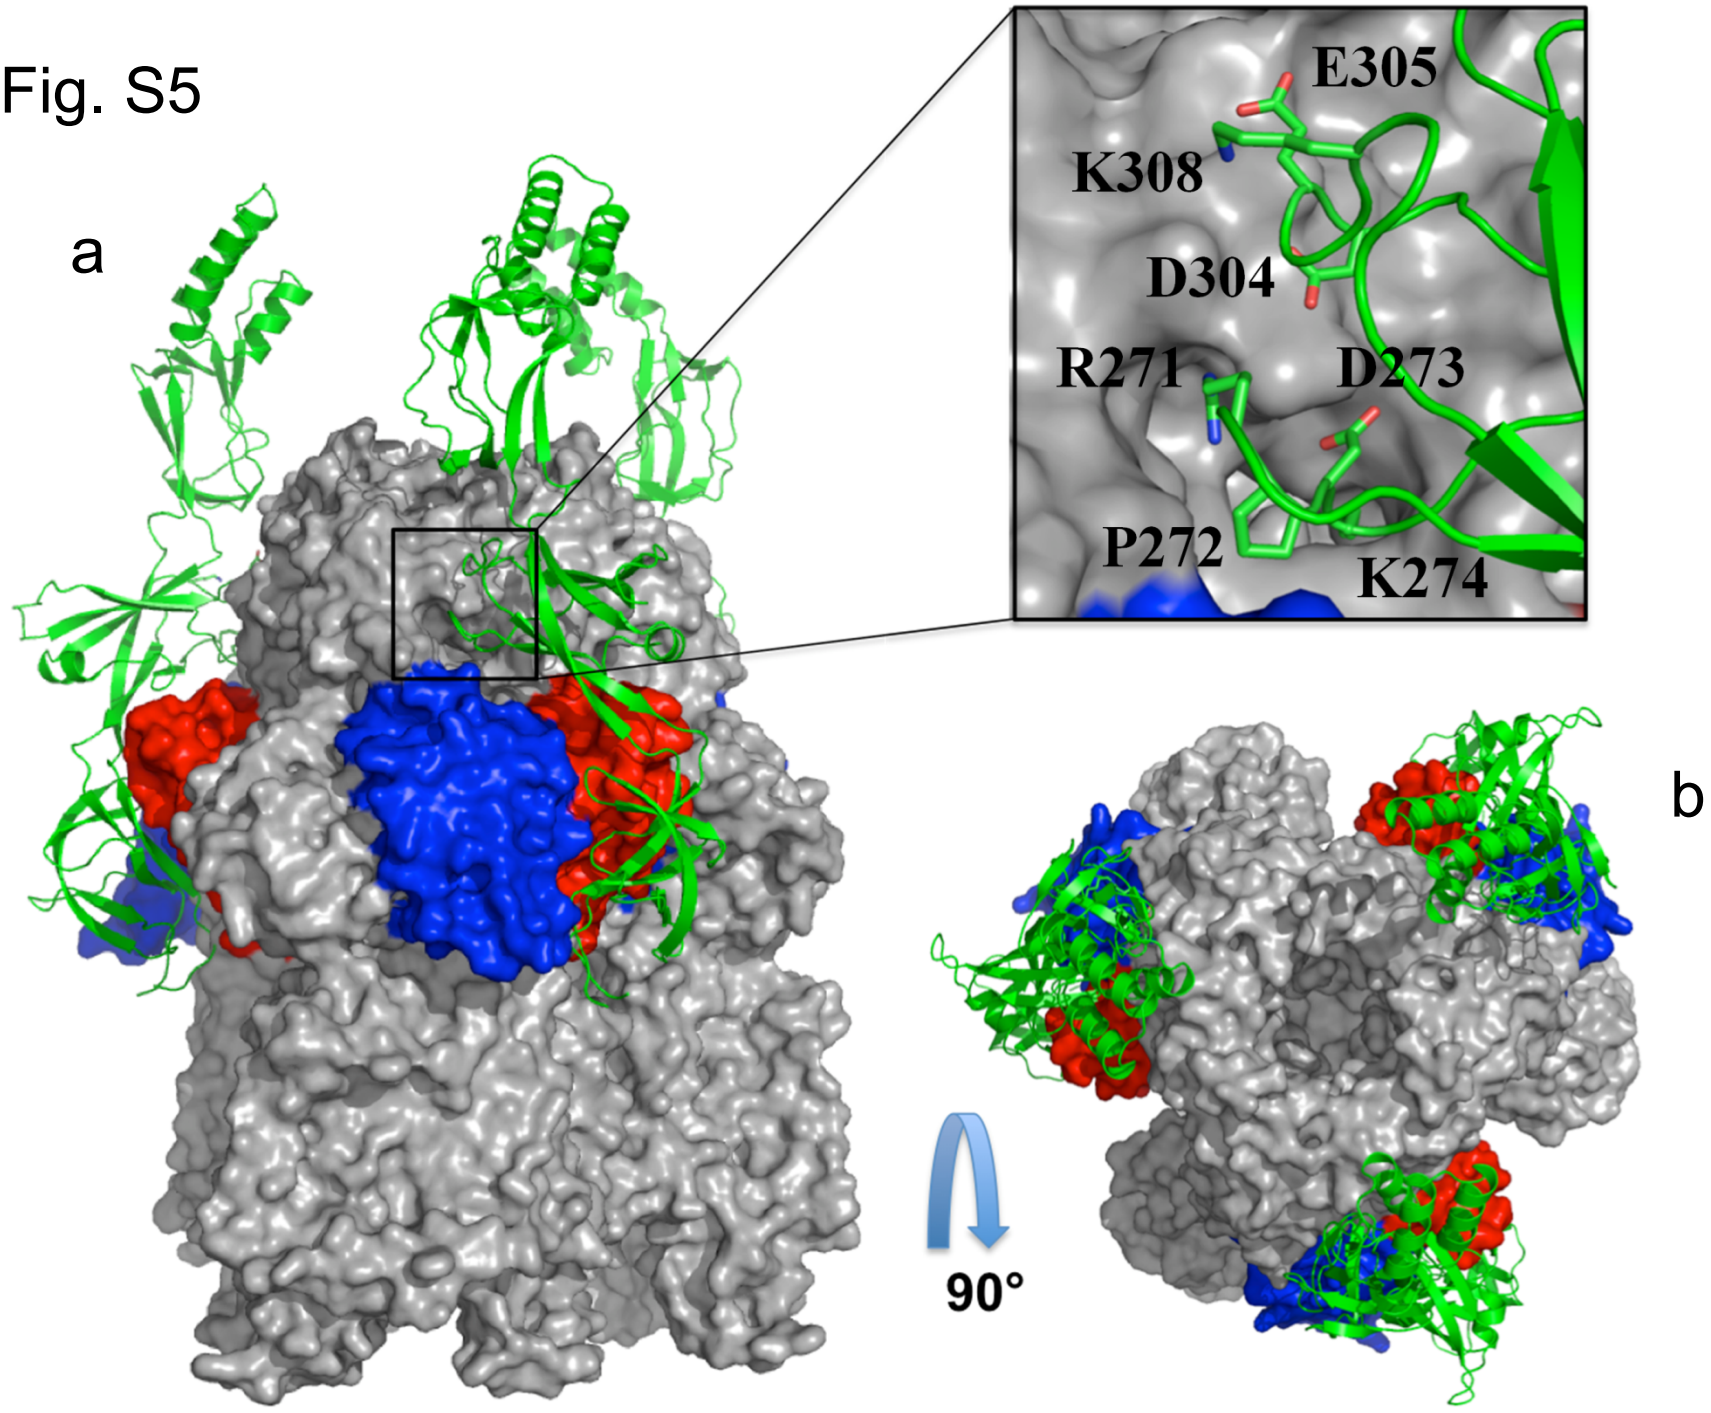

Fig. S6a

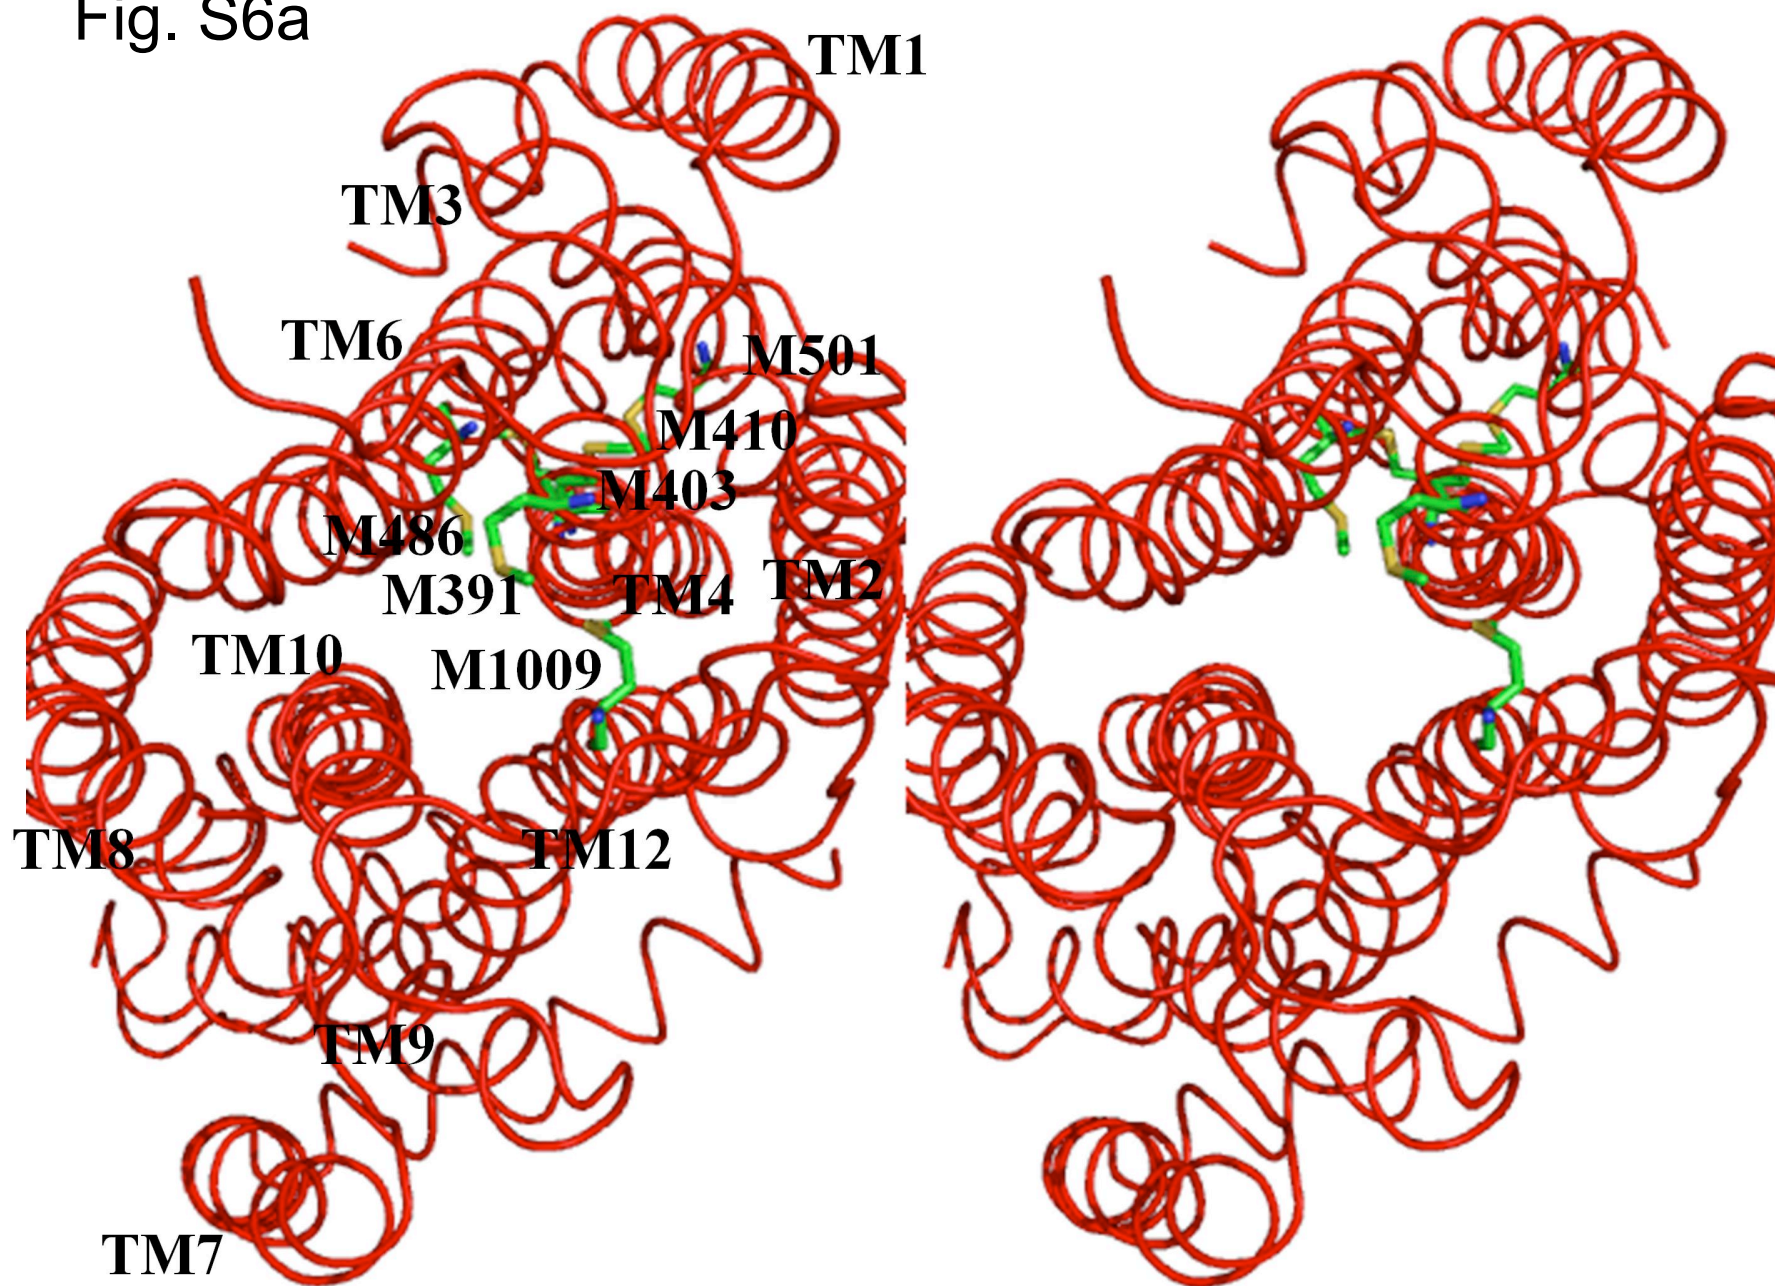

Fig. S6b

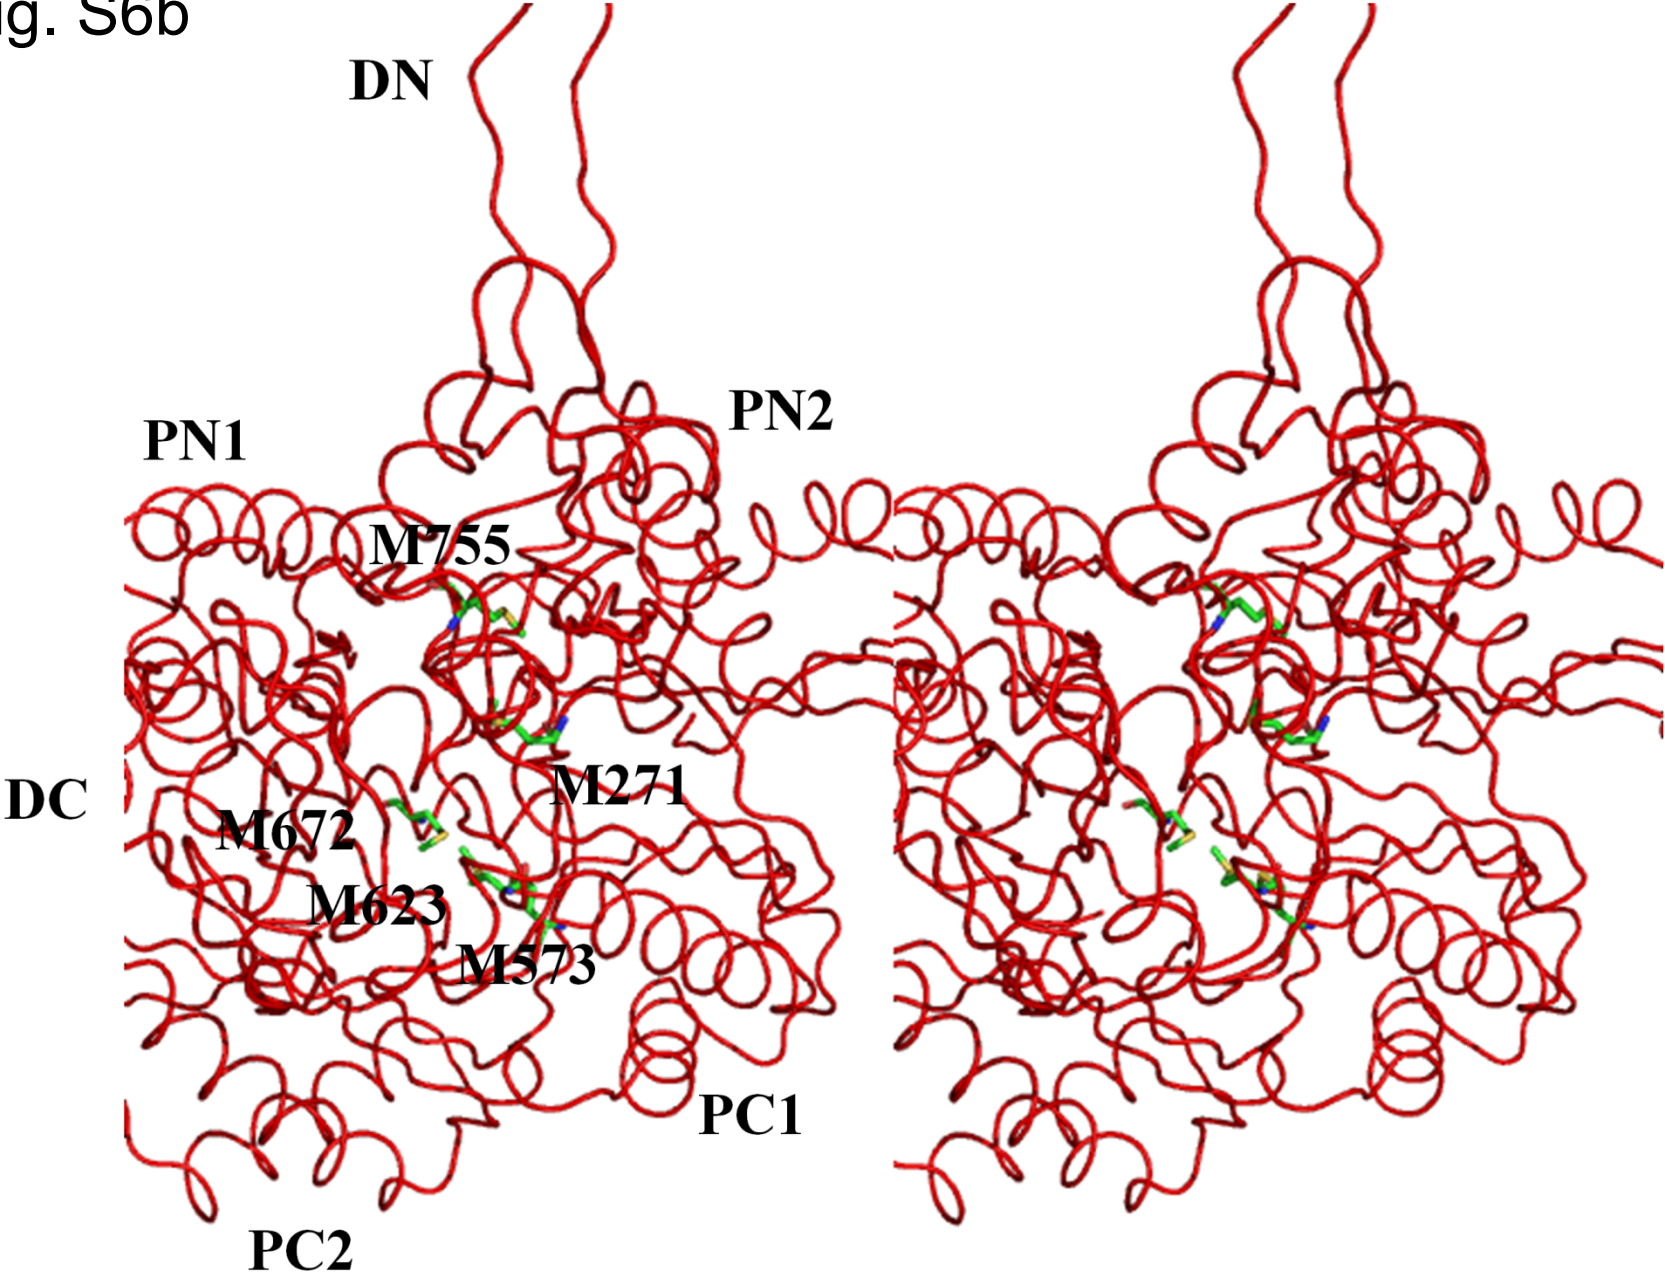





CusA\_Escherichia coli K12
Putative Shigella sonnei
CzCA\_Shevanella sp. ANA-3
SilA\_Klebsiella pneumoniae
Putative Serratia marcescens
SilA\_Salmonella Typhimurium
CzCA\_Erythrobacter sp. NAP1
CzCA\_Sphingopyxis alaskensis RB2256
CzCA\_Caulobacter sp. K31
CzCA\_Phenylobacterium zucineum HLK1
CzCA\_Asticcacaulis excentricus CB 48
CzCA\_Pseudomonas fluorescens Pf0-1
CzCA\_Thiobacillus denitrificans
CzCA\_Stenotrophomonas sp. SKA14
CzCA\_Acidovorax sp. JS42
CzCA\_Leptothrix cholodnii SP-6
CusA\_curvibacter
CzCA\_Ralstonia pickettii 12J
SilA\_Ralstonia metallidurans CH34
Putative Methylibium petroleiphilum PM1
CzCA\_Delftia acidovorans SPH-1
CzCA\_Yersinia kristensenii
CusA\_Klebsiella pneumoniae
CzCA\_Polaromonas naphthalenivorans CJ2
CusA\_Ewardsiella ictaluri
CusA\_Enhydrobacter aerosaccus SK60
CusA\_Citrobacter sp. 30-2
CzCA\_Acinetobacter junii SH205
Putative Pectobacterium carotovorum
CusA\_Providencia rettgeri DSM1131

CusA\_Escherichia coli K12
Putative Shigella sonnei
CzCA\_Shevanella sp. ANA-3
SilA\_Klebsiella pneumoniae
Putative Serratia marcescens
SilA\_Salmonella Typhimurium
CzCA\_Erythrobacter sp. NAP1
CzCA\_Sphingopyxis alaskensis RB2256
CzCA\_Caulobacter sp. K31
CzCA\_Phenylobacterium zucineum HLK1
CzCA\_Asticcacaulis excentricus CB 48
CzCA\_Pseudomonas fluorescens Pf0-1
CzCA\_Thiobacillus denitrificans
CzCA\_Stenotrophomonas sp. SKA14
CzCA\_Acidovorax sp. JS42
CzCA\_Leptothrix cholodnii SP-6
CusA\_curvibacter
CzCA\_Ralstonia pickettii 12J
SilA\_Ralstonia metallidurans CH34
Putative Methylibium petroleiphilum PM1
CzCA\_Delftia acidovorans SPH-1
CzCA\_Yersinia kristensenii
CusA\_Klebsiella pneumoniae
CzCA\_Polaromonas naphthalenivorans CJ2
CusA\_Ewardsiella ictaluri
CusA\_Enhydrobacter aerosaccus SK60
CusA\_Citrobacter sp. 30-2
CzCA\_Acinetobacter junii SH205
Putative Pectobacterium carotovorum
CusA\_Providencia rettgeri DSM1131

CusA\_Escherichia coli K12
Putative Shigella sonnei
CzCA\_Shevanella sp. ANA-3
SilA\_Klebsiella pneumoniae
Putative Serratia marcescens
SilA\_Salmonella Typhimurium
CzCA\_Erythrobacter sp. NAP1
CzCA\_Sphingopyxis alaskensis RB2256
CzCA\_Caulobacter sp. K31
CzCA\_Phenylobacterium zucineum HLK1
CzCA\_Asticcacaulis excentricus CB 48
CzCA\_Pseudomonas fluorescens Pf0-1
CzCA\_Thiobacillus denitrificans
CzCA\_Stenotrophomonas sp. SKA14







CzcA\_Stenotrophomonas sp. SKA14 AGVAEEFGVVMILYKQALAEPCDR----REPTREELLDAREGAVLRVRPKAMTVAVILAGLVPIVWSSGTGSEVMSR  
CzcA\_Acidovorax sp. JS42 AGVAEEFGVVMILYKQALAEPCDG----REPTREELLDAREGAVLRVRPKAMTVAVILAGLVPIVWSSGTGSEVMSR  
CzcA\_Leptothrix cholodnii SP-6 AGVAEEFGVVMILYKHALQDRLAAG----ASPSAALVDDAREGAVLRVRPKAMTVAVILAGLVPIVWSSGTGSEVMSR  
Cusa\_curvibacter AGVAEEFGVVMILYKQALADRESQG----AAPGVAMVLDAREGAVLRVRPKAMTVAVILAGLVPIVWSSGTGSEVMSR  
CzcA\_Ralstonia pickettii 12J AGVAEEFGVIMLLYLKHAHWTERQENG----QTSTQALLEAIQEGAVLRVRPKAMTVAVILAGLPIVWSSGTGSEVMQR  
Sila\_Ralstonia metallidurans CH34 AGVAEEFGVIMLLYLKHAHWDRLRG----EDTLDALLDAREGAVLRVRPKAMTVAVILAGLPIVWSSGTGSEVMQR  
Putative Methylibium petroleiphilum PM1 AGVAEEFGVIMLLYLKQAWEARLARG----LSSDADLMDAREGAVLRVRPKAMTVAVILAGLVPIVWSSGTGSEVMSR  
CzcA\_Delftia acidovorans SPH-1 AGVSAEFGVIMLLYLKNAWQERADQG----KTSEADLLDAREGAVLRVRPKAMTVAVILAGLPIVWSSGTGSEVMQR  
CzcA\_Yersinia kristensenii AGVAEEFGVIMVLYLNQAVKHKHRPQ----IAMTASEMSAAIHGAVLRVRPKAMTVAVILAGLPIVWSSGTGSEVMQR  
Cusa\_Klebsiella pneumoniae AGVAEEFGVVMMLYLKHAIEAEPSLKN--PQTFSDVKLDEALYQGAVLRVRPKAMTVAVILAGLPIVWSSGTGSEVMSR  
CzcA\_Polaromonas naphthalenivorans CJ2 AGVSAEFGVIMLLYLRLHAWD--ERLAQGGKTN---AEDLLDAREGAVLRVRPKAMTVAVILAGLPIVWSSGTGSEVMQR  
Cusa\_Edwardsiella ictaluri AGVAEEFGVVMMLYLKQAIIE--QDPALSHTRGFTPAALDEALYHGAVLRVRPKAMTVAVILAGLPIVWSSGTGSEVMSR  
Cusa\_Enhydrobacter aerosaccus SK60 AGVAEEFGVVMFLYLRKQAIIEHAQQSLSSSTASLTEQQLNEAHTGAVLRVRPKAMTVAVILAGLPIVWSSGTGSEVMSR  
CzcA\_Citrobacter sp. 30-2 AGVAEEFGVVMMLYLKHAIE--AEPALEN--PQFTADKLEALYHGAVLRVRPKAMTVAVILAGLPIVWSSGTGSEVMSR  
CzcA\_Acinetobacter junii SH205 AGVAEEFGVVMFLYLRKQAVEHAQQSLSSSTASLTEQQLNDAIRTGAVLRVRPKAMTVAVILAGLPIVWSSGTGSEVMSR  
Putative Pectobacterium carotovorum AGVSAEFGVIMLLYLRLHAWKRR--V--AGQALSQQQLMDAREGAVLRVRPKAMTVAVILAGLPIVWSSGTGSEVMSR  
Cusa\_Providencia rettgeri DSM1131 AGVAEEFGVVMMLYLKHAIEDKKEKQGG--ISKLSNQLDRALYEGAVLRVRPKAMTVAVILAGLPIVWSSGTGSEVMSR  
\*\*\*:\*\*\*\*:\*.\*\*: : : \* : \* : \*\*\*\* \* : \* : \* : \* : \*

Cusa\_Escherichia coli K12 IAAPMIGGMITAPLLSLFIIIPAAAYKLMWLHR----HRVRK----- 1047  
Putative Shigella sonnei IAAPMIGGMITAPLLSLFIIIPAAAYKLMWLHR----HRVRK----- 1047  
CzcA\_Shevanella sp. ANA-3 IAAPMIGGMITAPLLSLFIIIPAAAYKLIWLRR---HKKSVS----- 1048  
Sila\_Klebsiella pneumoniae IAAPMIGGMITAPLLSLFIIIPAAAYKLIWLRR---HKKSVS----- 1048  
Putative Serratia marcescens IAAPMIGGMITAPLLSLFIIIPAAAYKLIWLRR---HKKSVS----- 1048  
Sila\_Salmonella Typhimurium IAAPMIGGMITAPLLSLFIIIPAAAYKLIWLRR---HKKSVS----- 1048  
CzcA\_Erythrobacter sp. NAP1 IAAPMIGGMITAPLLSLFIIIPAAAYLMLRRR---PERPQPQGEEECVQPS--- 1055  
CzcA\_Sphingopyxis alaskensis RB2256 IAAPMVGGMITAPLLSLFVIPAAYLLMRQRK---AKPNPQPD-----QP--- 1047  
CzcA\_Caulobacter sp. K31 IAAPMIGGMLTAPLLSLMFVVPAAAYLLIERR---LSRPRGPT-----IAHG--- 1049  
CzcA\_Phenylobacterium sucineum HLK1 IAAPMIGGMLTAPLLSLMFVVPAGYLLLR---PSRTSILK-----GDQP--- 1049  
CzcA\_Asticcacaulis excentricus CB 48 IAAPMIGGMLTAPLLSLMVLVPAAYLLIERR---RSNPPQSN-----SQQ--- 1048  
CzcA\_Pseudomonas fluorescens Pf0-1 IAAPMVGGMITAPLLSLFVIPAAYRLMR---LPAENKSPQSDDASTIQP--- 1056  
CzcA\_Thiobacillus denitrificans IAAPMVGGMITAPLLSLMFVIPAAYLMLRRR---PQPHAPHPHHSSEGHP--- 1060  
CzcA\_Stenotrophomonas sp. SKA14 IAAPMIGGMITAPLLSLFVIPAAYLLMRKFR---PQPHAPHPHHSSEGHP--- 1039  
CzcA\_Acidovorax sp. JS42 IAAPMIGGMITAPLLSLFVIPAAYLLMRKFR---PQPHAPHPHHSSEGHP--- 1039  
CzcA\_Leptothrix cholodnii SP-6 IAAPMIGGMITAPLLSLFVIPAAYLLMRKFR---PQPHAPHPHHSSEGHP--- 1066  
Cusa\_curvibacter IAAPMIGGMITAPLLSLFIIIPAAAYRMMRVRT---SRRLN----- 1044  
CzcA\_Ralstonia pickettii 12J IAAPMIGGMITAPLLSLFVIPAAYLLMRKFR---PQPHAPHPHHSSEGHP--- 1055  
Sila\_Ralstonia metallidurans CH34 IAAPMVGGMITAPLLSLMFVVPAAAYLLLR---LPSSTTAKQAELEAV--- 1056  
Putative Methylibium petroleiphilum PM1 IAAPMVGGMITAPLLSLMFVIPAAYRLLRRRRASAGEAAAAPGKSSIPTPAPSAA 1063  
CzcA\_Delftia acidovorans SPH-1 IAAPMVGGMITAPLLSLMFVIPAAYLLMRKFR---ERKASPMWFRHRAAAA--- 1056  
CzcA\_Yersinia kristensenii IAAPMIGGMITAPLLSLFIIIPAAAYLLMRKFR---ERKASPMWFRHRAAAA--- 1034  
Cusa\_Klebsiella pneumoniae IAAPMIGGMITAPLLSLFIIIPAAAYKLMWLSR---HRGKRSE----- 1049  
CzcA\_Polaromonas naphthalenivorans CJ2 IAAPMVGGMITAPLLSLMFVIPAAYLLMRKFR---ERKASPMWFRHRAAAA--- 1055  
Cusa\_Edwardsiella ictaluri IAAPMIGGMITAPLLSLFIIIPAAAYKLIWLHRQRATR---RTDSSA----- 1054  
Cusa\_Enhydrobacter aerosaccus SK60 IAAPMVGGMITAPLLSLMFVIPAAYQLLIKRLKSKN----- 1048  
Cusa\_Citrobacter sp. 30-2 IAAPMIGGMITAPLLSLFIIIPAAAYKLMWLRHRGQK----- 1047  
CzcA\_Acinetobacter junii SH205 IAAPMVGGMITAPLLSLMFVIPAAYQLLIKRLKSKN----- 1048  
Putative Pectobacterium carotovorum IAAPMIGGMITAPLLSLMFVIPAAYLLMRKFR---ERKASPMWFRHRAAAA--- 1045  
Cusa\_Providencia rettgeri DSM1131 IAAPMIGGMITAPLLSLFIIIPAAAYKLIWLHRQRATR---RTDSSA----- 1045  
\*\* \*\* : \* : \* : \* : \* : \* : \* : \* : \* : \* : \* : \* : \* : \*

Fig. S8a

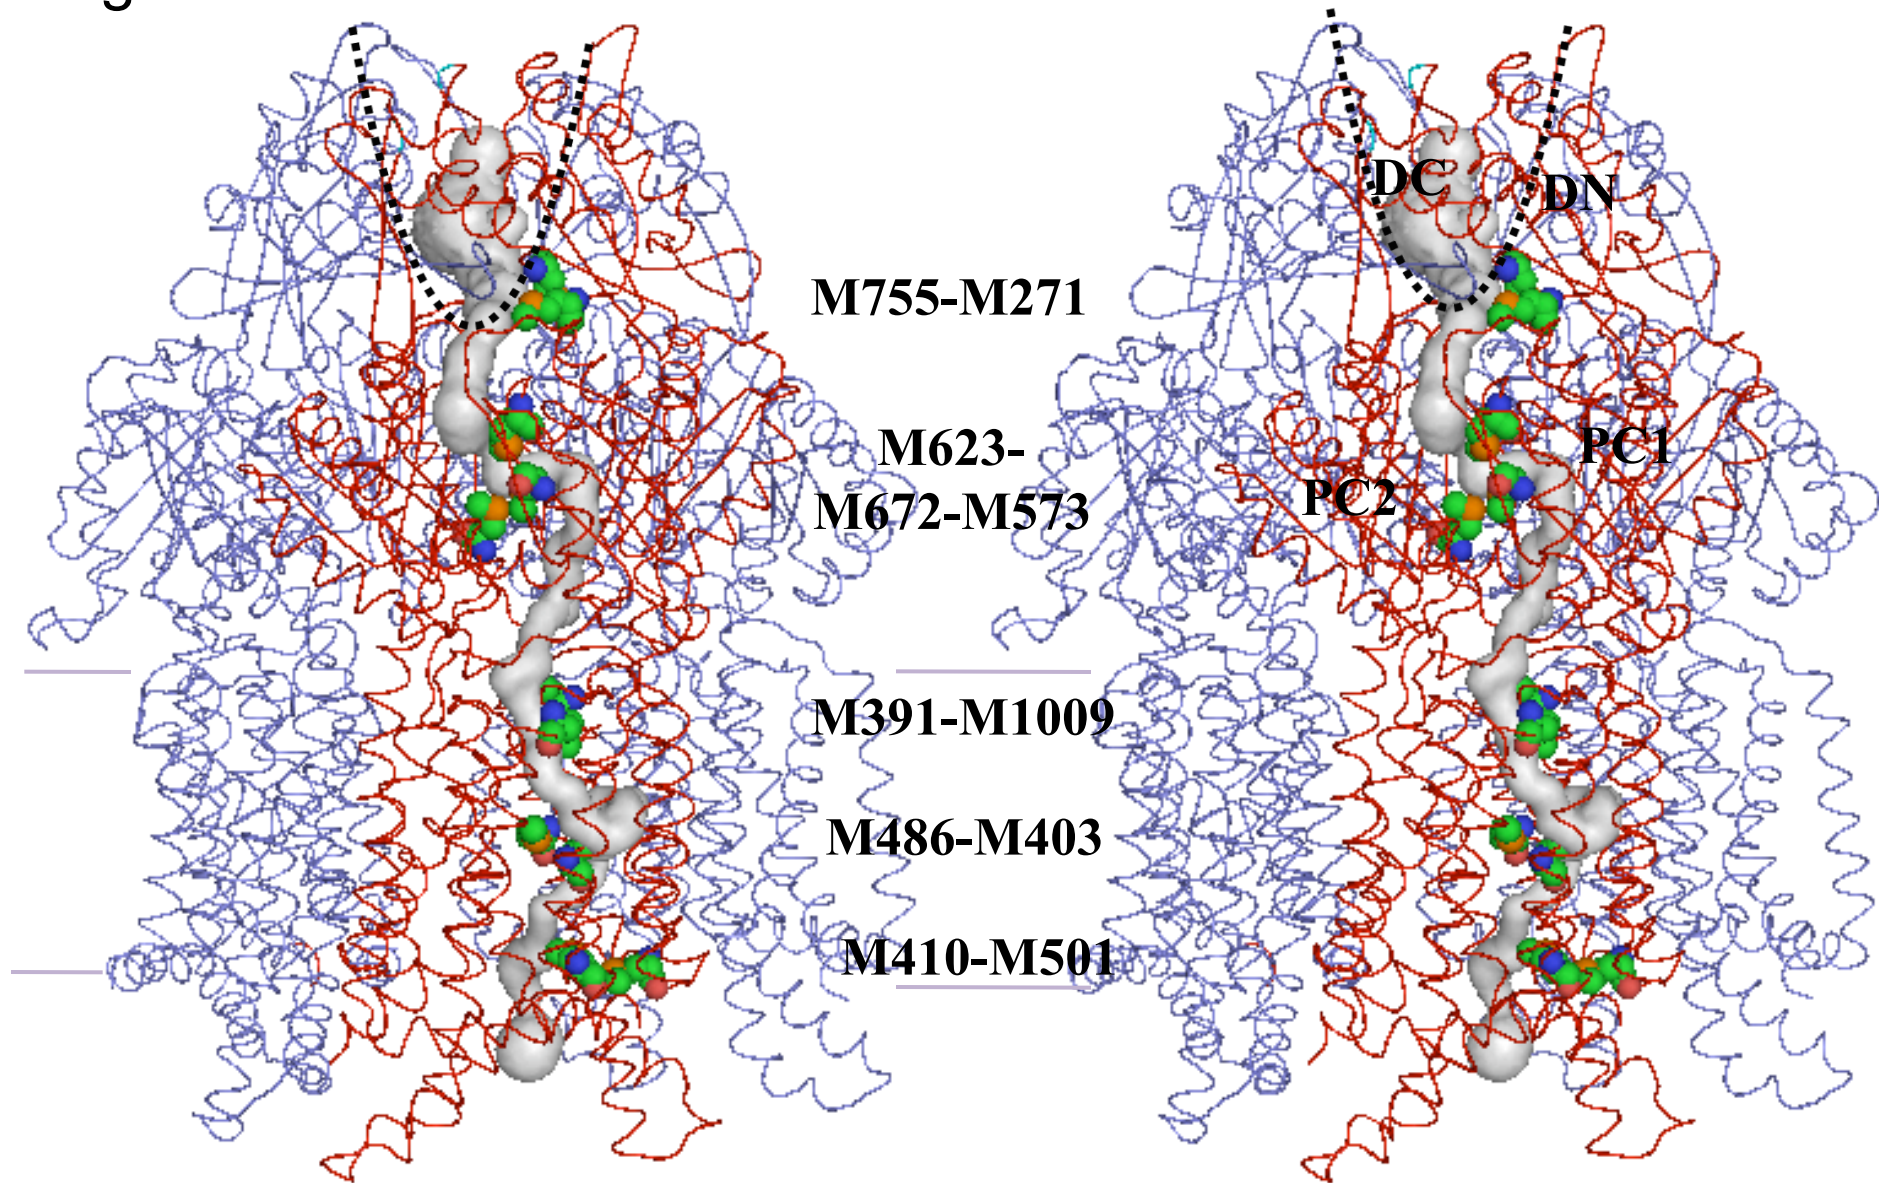

Fig. S8b

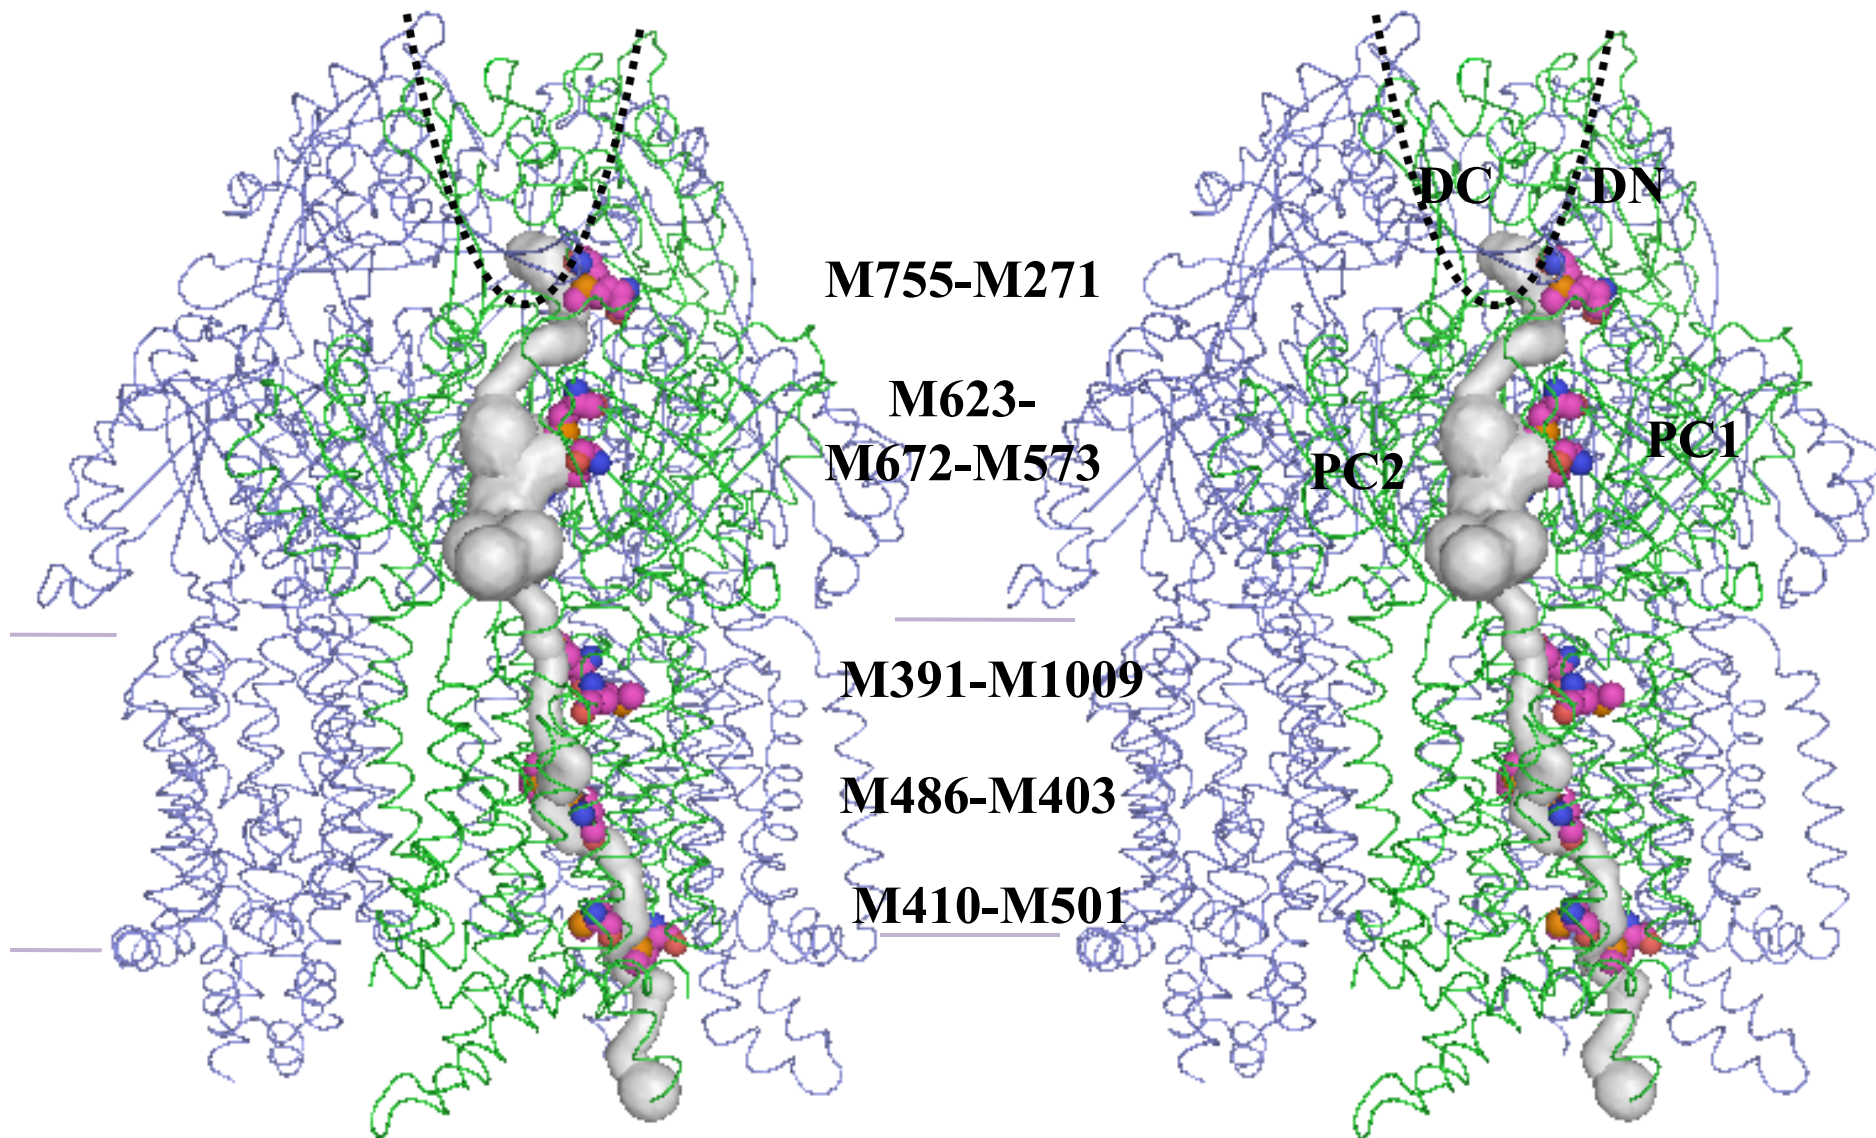

Fig. S9

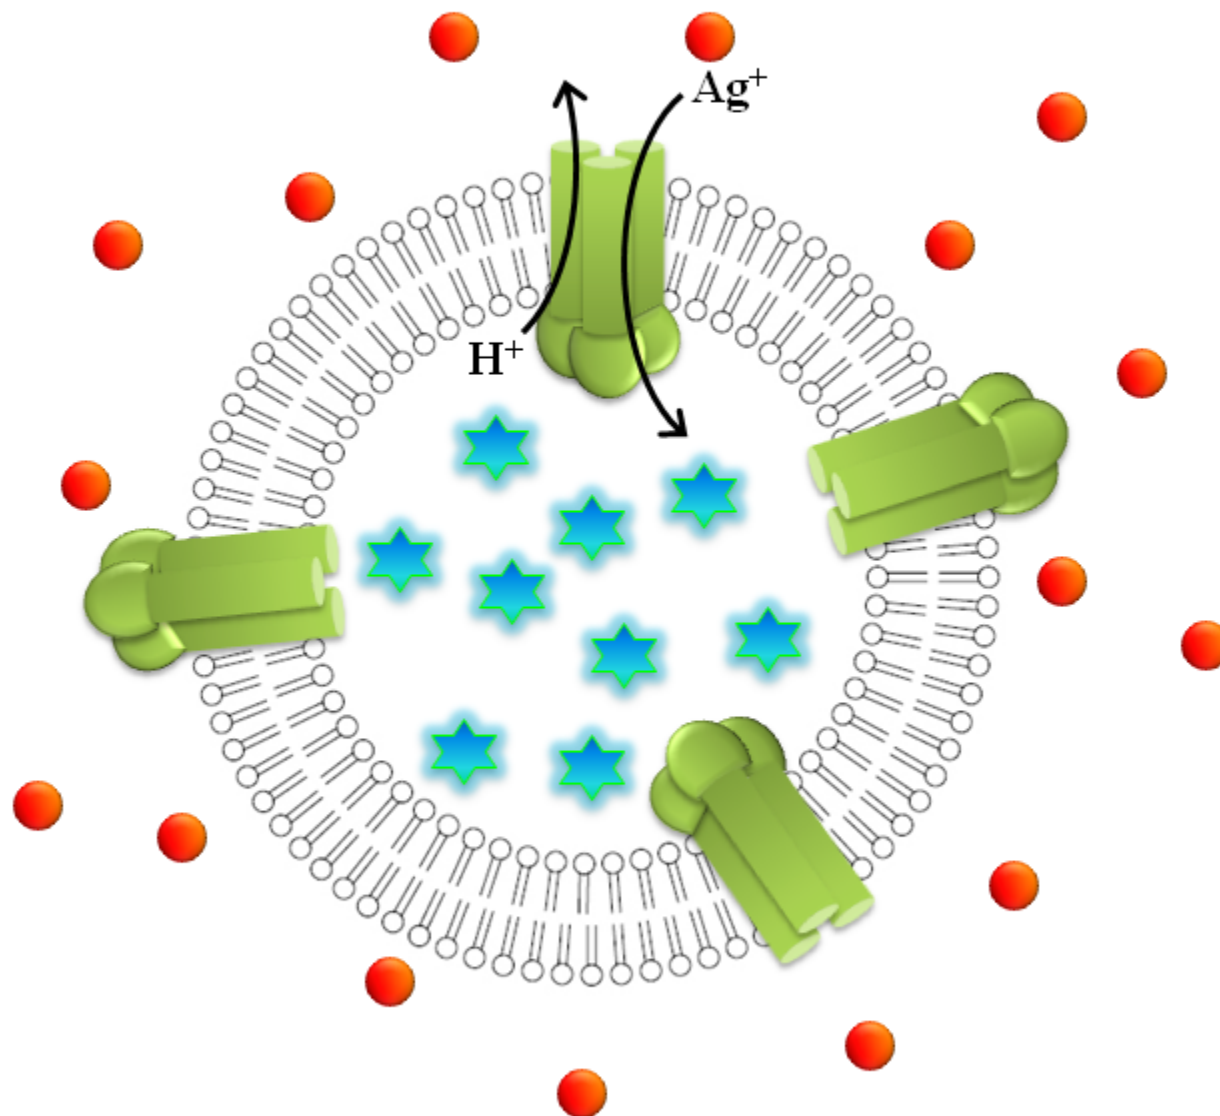

Fig. S10

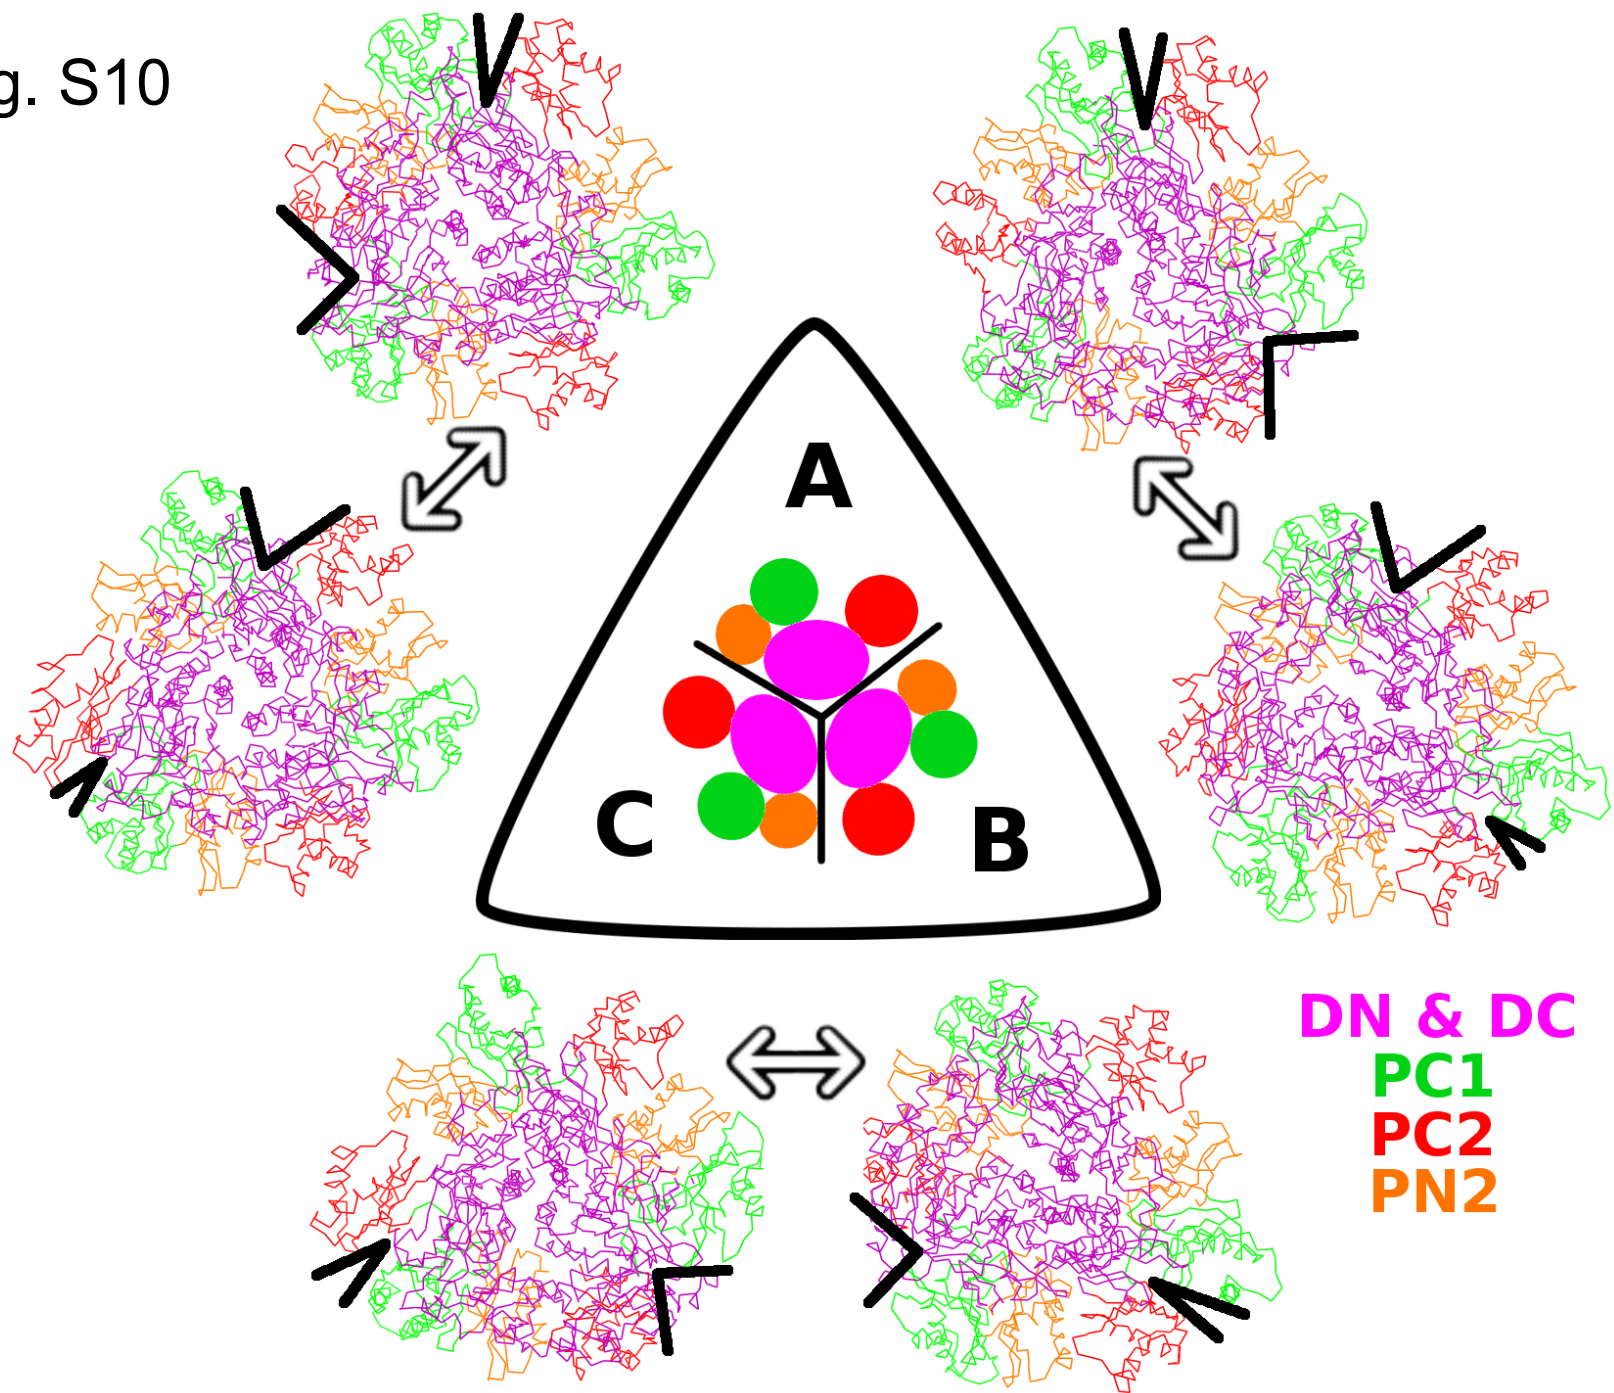

Fig. S11

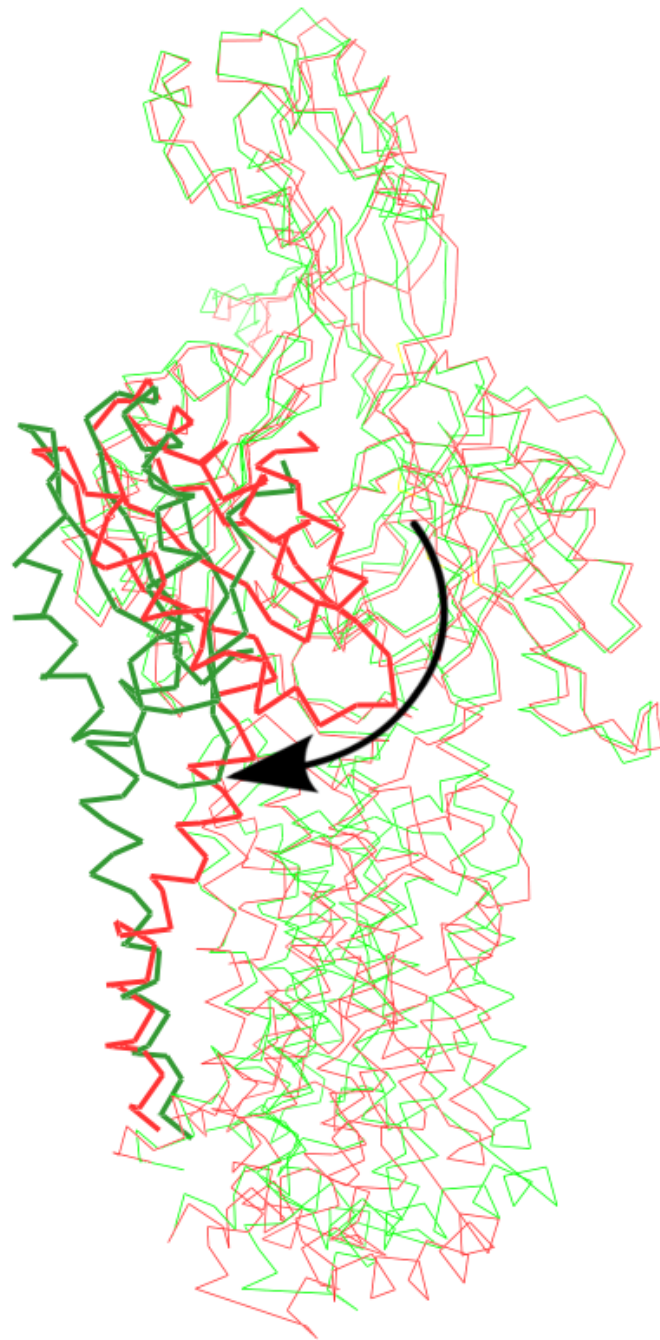

Fig. S12

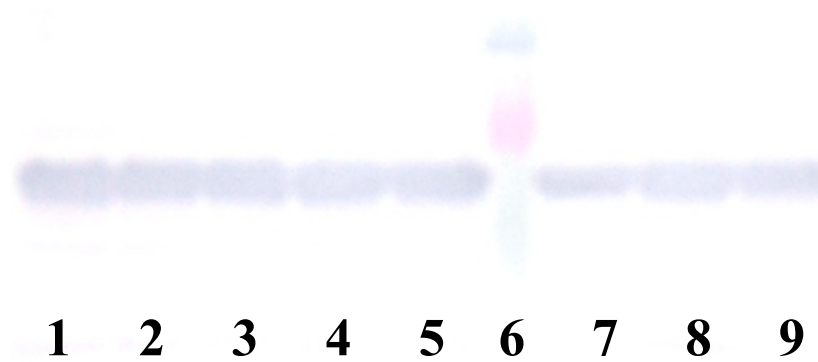



Fig. S13

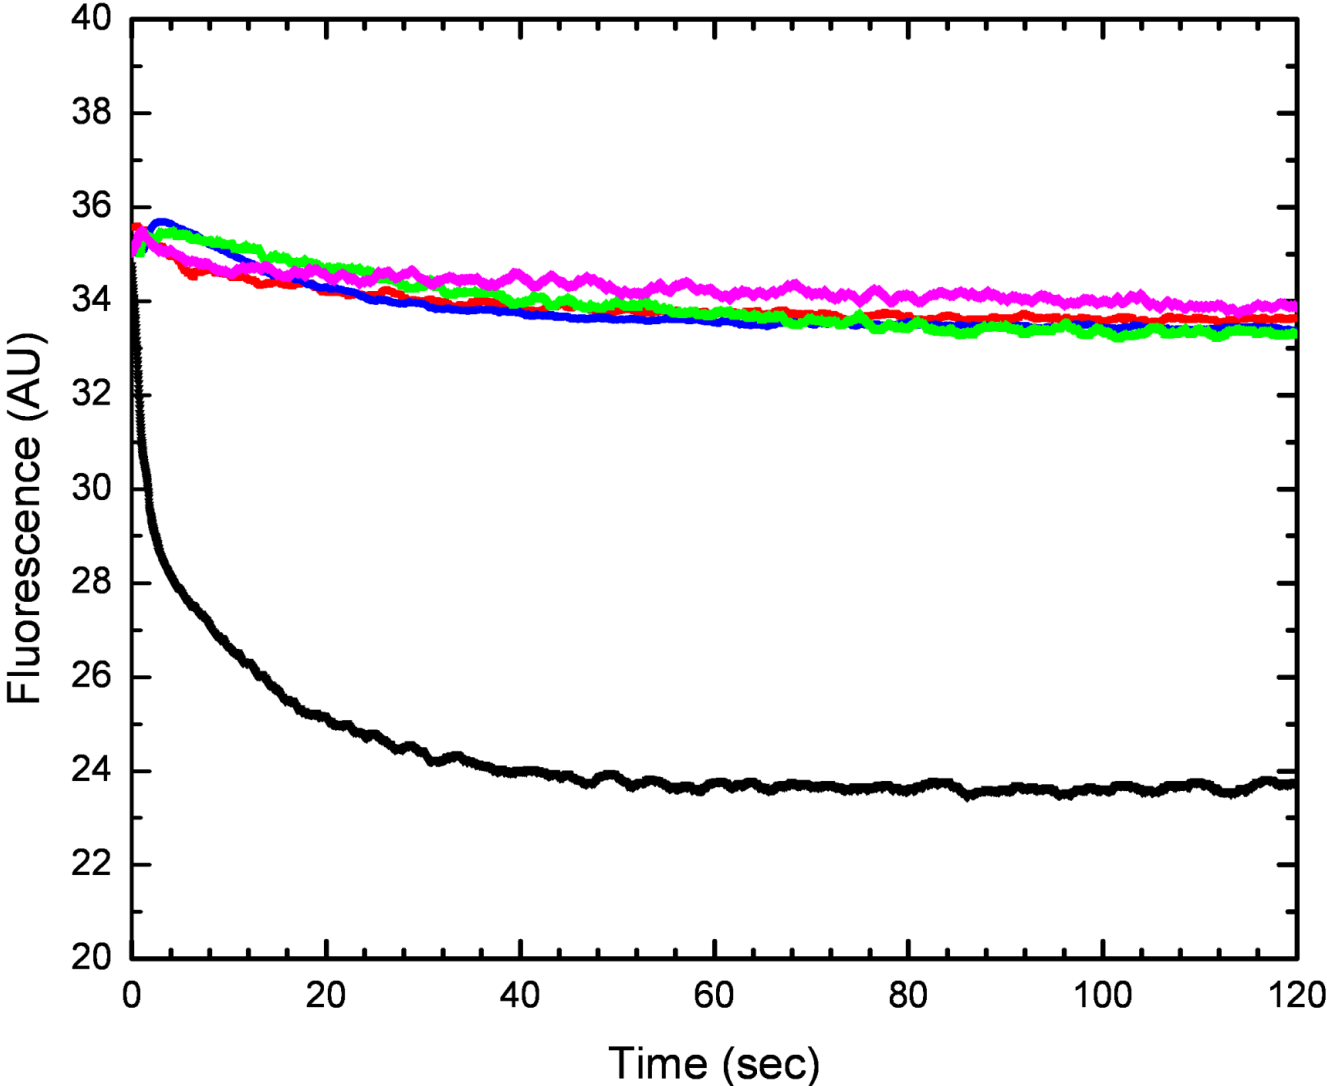

Fig. S14

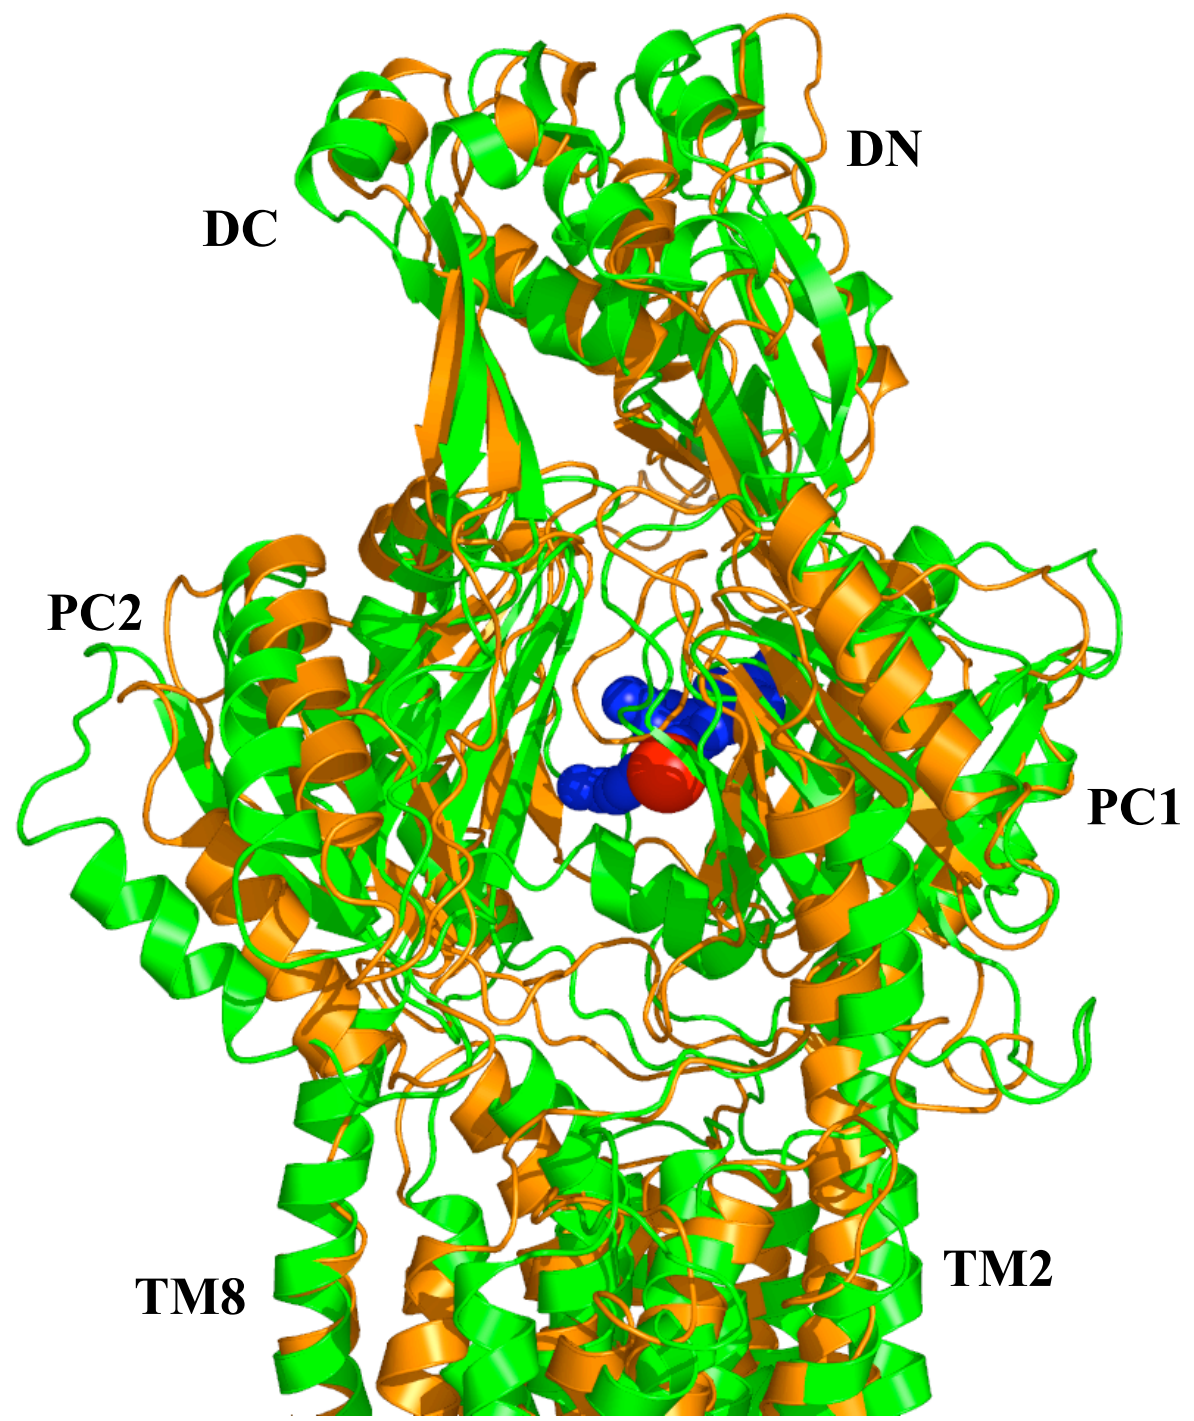

## MANUSCRIPT CHECKLIST

Manuscript number . . . 2009-12-15523C  
 Author name . . . EDWARD . . . YU . . .  
 Article type . . . Letters . . . to . . . Nature . . .

The following checklist is intended to aid the publication of your manuscript. Please read through the list carefully and amend your manuscript as appropriate. To avoid delays in the production process, please complete and return this sheet with the final version of your manuscript.

### Text

*Nature* will edit text to conform to house style and for clarity and accessibility. Please check the following points when preparing the final version of your manuscript.

#### Letters to *Nature*

- Title no longer than 90 characters (including spaces)
- First paragraph referenced and no longer than 300 words
- No subheadings in main text
- Methods for print no longer than 300 words
- Online-only Methods provided as part of the main text file?
- No more than 30 references

#### Articles

- Title no longer than 75 characters (including spaces)
- First paragraph unreferenced and no longer than 150 words
- No more than 6 main subheadings of up to 40 characters (including spaces)
- Methods for print no longer than 300 words
- Online-only Methods provided as part of the main text file?
- No more than 50 references

#### All manuscripts (if applicable)

- Abbreviations and symbols defined on first use
- Italic font used for variables, genes and non-English languages; bold font for vectors
- Equations and special characters in Word in 'normal text' or Symbol font (Word Equation Editor avoided where possible)
- Authored in Compatibility Mode if using Word 2007 (i.e., as a Word 97-2003 document; saved as .doc format, NOT .docx)
- Brief title provided for each figure, table and box
- Figure legends no more than 100 words each (300 words each for contributions without methods sections)
- Author contribution statement included (a statement of responsibility that specifies the contribution of every author; see [http://www.nature.com/authors/editorial\\_policies/authorship.html](http://www.nature.com/authors/editorial_policies/authorship.html))
- Declaration and listing of any competing interests included in manuscript in the Author Information section (<http://www.nature.com/nature/authors/policy/competing.html>)
- Database accession numbers included for sequences determined in this paper
- Structure data in *Nature* standard tables

### For TeX users

Word or rtf formats are preferred, unless there is very extensive use of special characters or equations. Such formats enable on-screen subediting and the preparation of a 'pre-proof', when the editing can be checked before formal proofs are prepared. We have found that this minimizes the chance of errors being inadvertently introduced.

- Word conversion not practicable

### Artwork

Contact our subeditors at [authors@nature.com](mailto:authors@nature.com) for further help and advice on preparing text for publication.

*Nature* will edit figures to conform to house style and for clear reproduction in print. Standard figure sizes are 89 mm wide (single column) and 183 mm wide (double column); figures can also be a column-and-a-half width where necessary (120-136 mm). Please check the following points when preparing your figures.

#### Electronic figure formats

- Preferred file formats for line (or vector) artwork and graphs are unflattened eps, postscript, pdf and Illustrator (ai) files
- Preferred file formats for photographic images are TIFF and Photoshop (minimum resolution 300 dpi). If you have created images with separate components on different layers, please send us the Photoshop file (.psd) with the layers intact
- For a full list of acceptable electronic formats, see <http://www.nature.com/nature/authors/submissions/final>

#### When preparing and sending figures

- Text in an editable format and in sans serif font (Helvetica, Arial)
- Text and lines clearly visible when figure is sized for page: type size 6-8 point; lines preferably 0.5 point (0.18 mm)
- Colour images in CMYK (not RGB) mode; ensure you are happy with the conversion from RGB to CMYK before submission
- Suggestions for cover artwork submitted if desired
- Completed colour costs form submitted with manuscript ([http://www.nature.com/nature/authors/submissions/final/colfigs\\_Jan2009.pdf](http://www.nature.com/nature/authors/submissions/final/colfigs_Jan2009.pdf))
- For reviews/Insight articles, permission obtained for any republished or redrawn illustrations

See [http://www.nature.com/nature/authors/submissions/final/Final\\_artwork.pdf](http://www.nature.com/nature/authors/submissions/final/Final_artwork.pdf) for detailed guidelines. For further help and advice, e-mail our art editors at [art@nature.com](mailto:art@nature.com).

*Nature* does not edit online-only material. Please check the following points when preparing Supplementary Information:

### Supplementary Information

- Supplementary Information referred to in main text (print version) of paper
- Summary diagram/figure included as part of the Supplementary Information (optional)
- Separate text file ('SI Guide') provided with a brief description (file format and content) of each item
- We recommend that all Supplementary Information is supplied as a single PDF file, where possible.

See <http://www.nature.com/nature/authors/submissions/final> for advice on preparing Supplementary Information.

E-mail [authors@nature.com](mailto:authors@nature.com) if you have additional queries.

# nature

Dear Author,

Your paper may be eligible for our advance online publication (AOP) programme. In this programme, your paper will be published online on *Nature's* website at [www.nature.com/nature](http://www.nature.com/nature) as soon it is typeset and your proof corrections returned. It will be published in print as soon afterwards as space is available. The two versions of the paper are identical.

Our offer of this service is conditional on your agreement to the following:

- Your text, figures and any supplementary information are **all** included when you send us the final version of your paper for formal acceptance, and are **all in Nature-preferred format** (within length and below maximum sizes) as specified in our format instructions at <http://www.nature.com/nature/authors>.
- The corresponding (or otherwise designated) author undertakes to read and return the proofs **within 48 hours** of their receipt.
- If figures are in colour, the corresponding author signs and returns the the colour-figure payment form\*, **before** the paper is formally accepted.
- The corresponding author signs and returns the "author licence" form **with** the returned proof, **not later**.
- **No changes** can be made to the paper once the online version is published.

Please sign and return this letter, preferably scanned and uploaded with the final version of your manuscript, or fax letter to +44 207 843 4596 if this is not possible. Please specify below the author responsible for returning proofs if different from the corresponding author.

I agree to the above terms and conditions for AOP publication of my paper in *Nature*:

Name: EDWARD YU

Manuscript number: 2009-12-15523C

Name and contact details (phone, fax and email) of author responsible for returning proofs **if not the corresponding author**:

\*Note, the offer of AOP publication is not related to authors' ability to contribute to costs of reproduction of colour figures.

# nature

Corresponding Author Name: EDWARD YU

Address: IOWA STATE UNIVERSITY, A115 Zaffarano,  
Ames, IA 50011, USA

Manuscript Reference Number: 2009-12-15523C

## COLOUR FIGURES IN NATURE

*Nature* is committed to providing authors with the highest quality figures, and we use the latest techniques to achieve this reproduction. We recognise, however, that excessive colour figure and page charges can sometimes place an enormous burden on authors. We therefore charge authors a fee of £735 for the first colour figure and £262.50 per figure for additional colour figures; this covers part, but not all, of our additional costs for four-colour reproduction. (Please note that in EU countries VAT will be added if you are unable to provide us with your VAT details below.)

No author will be denied publication based on his/her inability to meet these charges. If we agree that colour is essential but you are unable to meet the costs, they will be waived if you explain the circumstances to the editor who handled your manuscript before your paper is published. Otherwise you will be billed after publication.

**PLEASE COMPLETE AND SIGN THE SECTION BELOW, DELETING WHICHEVER ALTERNATIVE DOES NOT APPLY, AND RETURN A COPY OF THIS SHEET TO NATURE.**

I agree to pay the sum requested by *Nature* in the event that colour is considered essential.

I am unable to meet the costs of colour for the following reason:

For EU member countries, please tick the box and provide the VAT number if your Institution/University is exempt from VAT:

My Institution/University is a VAT registered paying member of the EU

VAT NUMBER 

|  |  |
|--|--|
|  |  |
|--|--|

|  |  |  |  |  |  |  |  |  |  |  |  |  |  |  |  |  |  |  |
|--|--|--|--|--|--|--|--|--|--|--|--|--|--|--|--|--|--|--|
|  |  |  |  |  |  |  |  |  |  |  |  |  |  |  |  |  |  |  |
|--|--|--|--|--|--|--|--|--|--|--|--|--|--|--|--|--|--|--|

SIGNED: Edward Yu

NAME IN BLOCK LETTERS: EDWARD YU
